# Supplementary material for: A visible light mediated, metal and oxidant free highly efficient cross dehydrogenative coupling (CDC) reaction between quinoxalin-2(1H)-ones and ethers
Source: Royal Society of Chemistry journal article supplement (doi:10.1039/c9nj00075e), 2019-01-01

## **A Visible Light Mediated, Metal and Oxidant Free Highly Efficient Cross Dehydrogenative Coupling (CDC) Reaction between Quinoxalin-2(1*H*)-ones and Ethers**

**Kishor D. Mane,<sup>a,b</sup>Rohit B. Kamble<sup>a,b</sup>and Gurunath Suryavanshi<sup>\*a,b</sup>**

*<sup>a</sup>Chemical Engineering and Process Development Division, CSIR-National Chemical Laboratory, Dr. Homi bhabha Road, Pune-411 008*

*<sup>b</sup>Academy of Scientific and Innovative Research, Ghaziabad 201 002, India*

\*Corresponding author: Tel.: +91 20 25902547; Fax: +91 20 25902676;  
e-mail:gm.suryavanshi@ncl.res.in

| <b>Sr. No</b> | <b>Content</b>       | <b>Page No.</b> |
|---------------|----------------------|-----------------|
| <b>1</b>      | <b>NMR Spectra's</b> | <b>S2</b>       |
| <b>2</b>      | <b>HRMS</b>          | <b>S22</b>      |

# NMR Spectra's

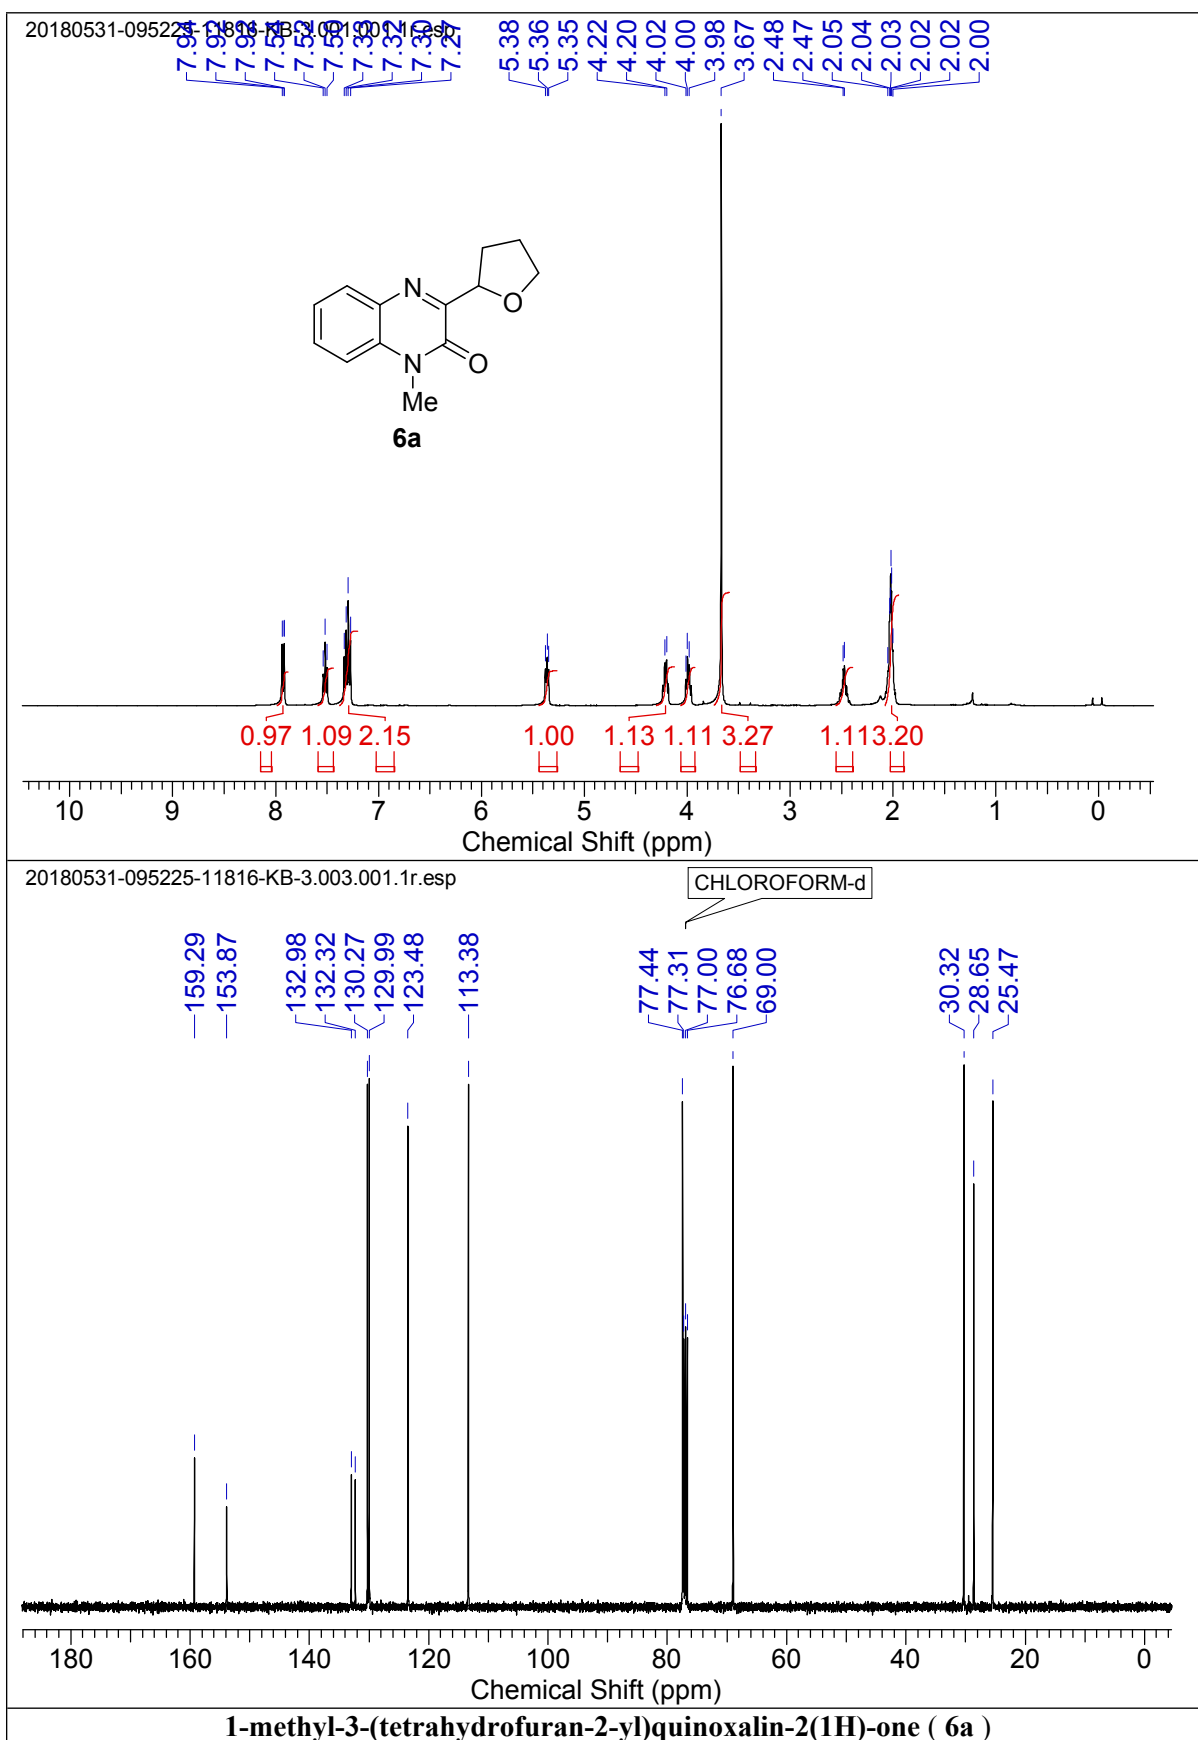

AV-200-20180616-093508-11816-18-KB-5-001.001.1r.esp  
CHLOROFORM-d

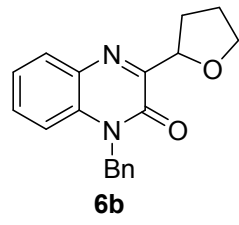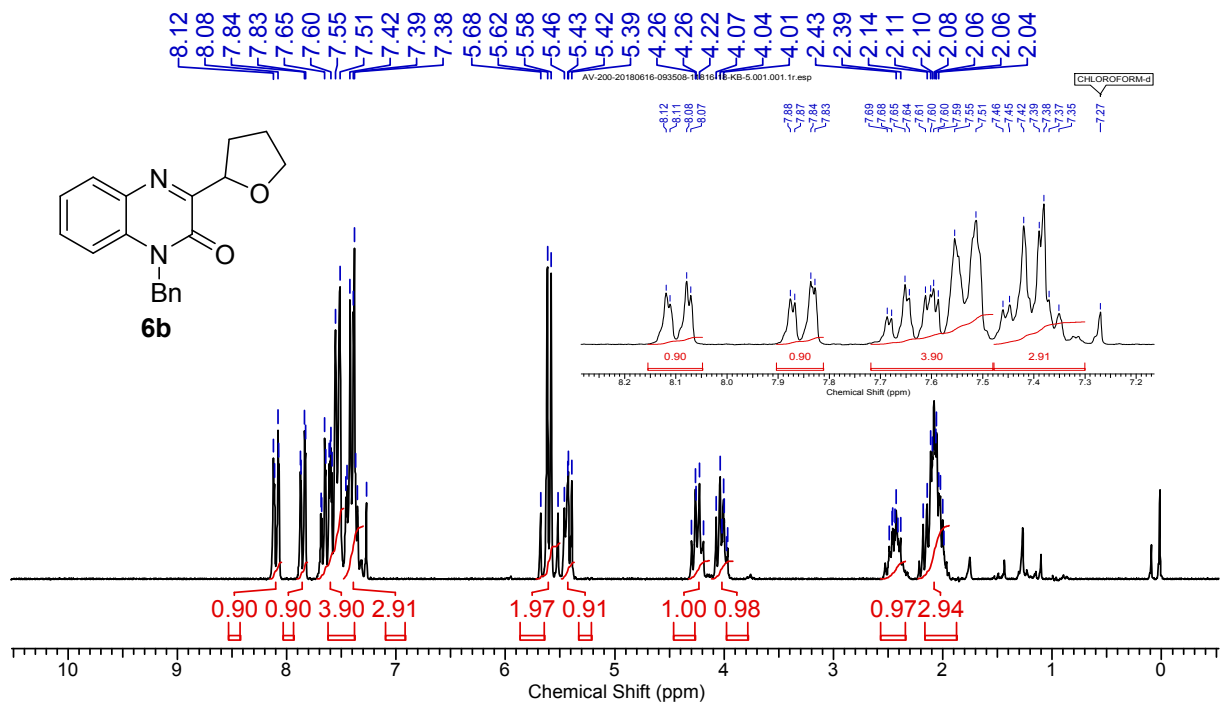

AV-200-20180615-124016-11772-51-KB-5.001.001.1r.esp

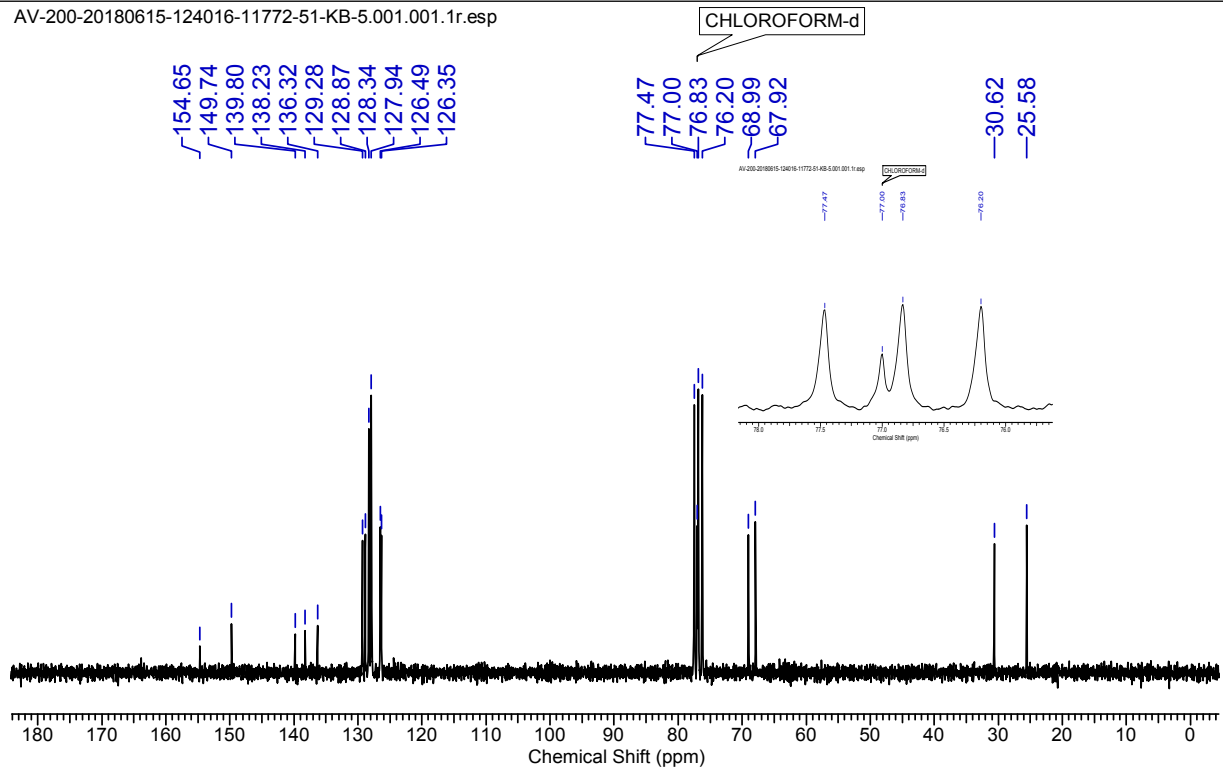

**1-benzyl-3-(tetrahydrofuran-2-yl)quinoxalin-2(1H)-one(6b)**

AV-500-20180811-093544-11801-KB-11.001.001.1r.esp

TMS

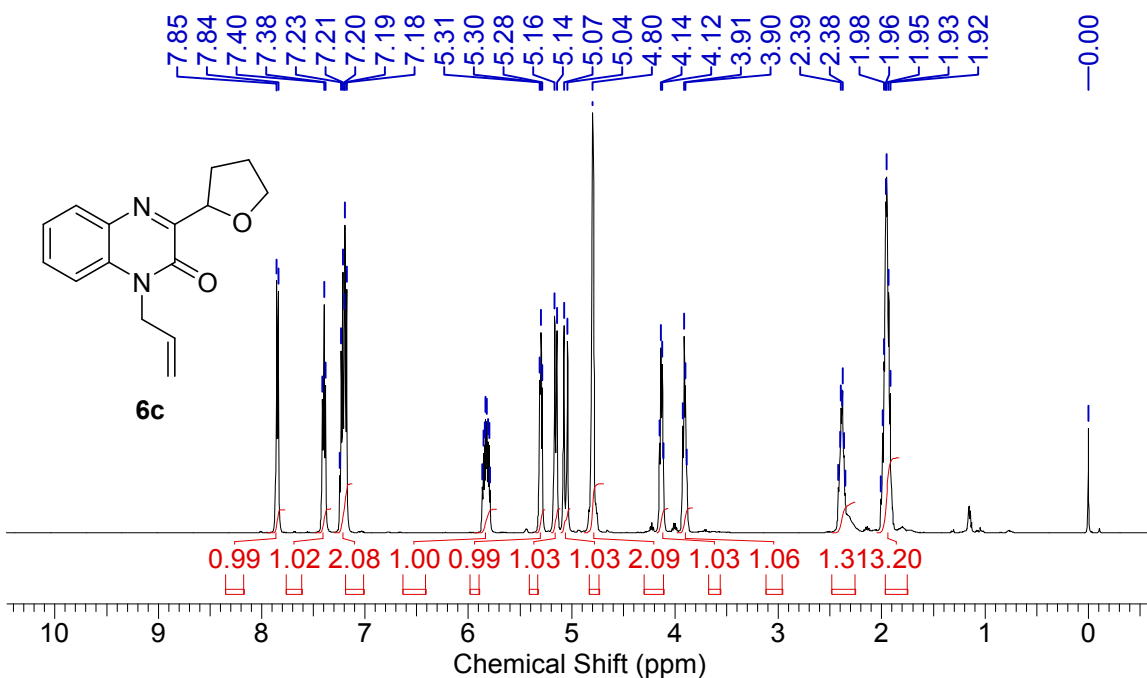

AV-500-20180811-093544-11801-KB-11.002.001.1r.esp

CHLOROFORM-d

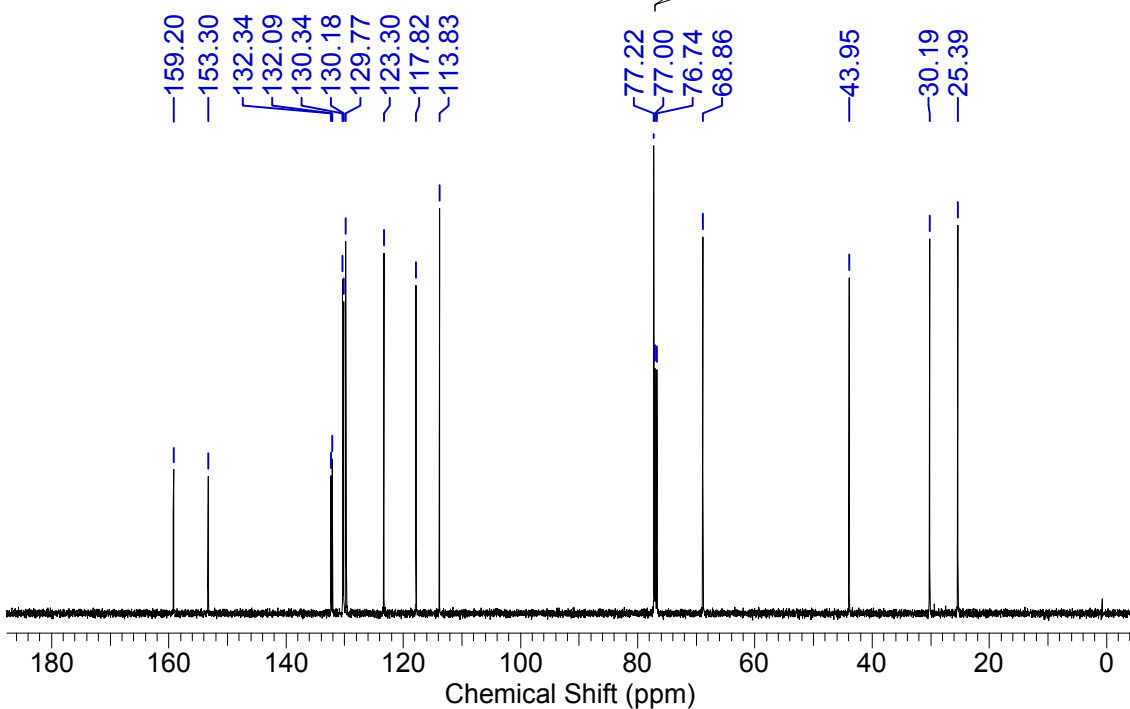

**1-allyl-3-(tetrahydrofuran-2-yl)quinoxalin-2(1H)-one(6c)**

20180531-095651-11816-KB-4.001.001.1r.esp

TMS

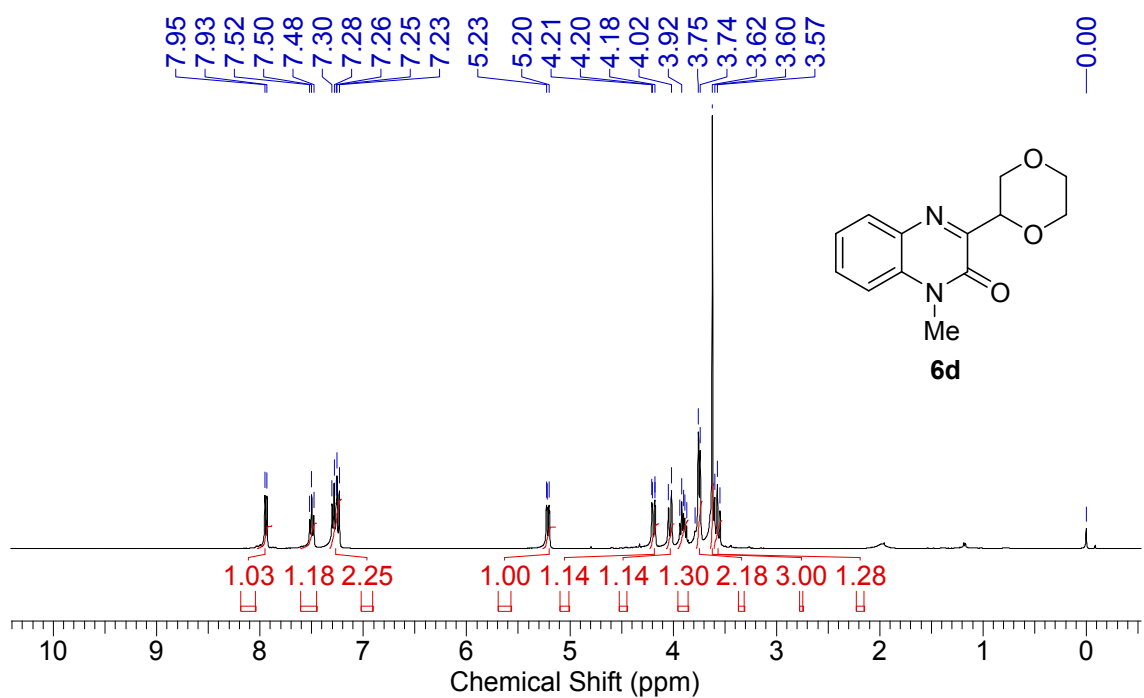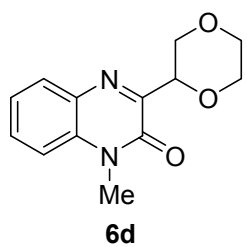

20180531-095651-11816-KB-4.003.001.1r.esp

CHLOROFORM-d

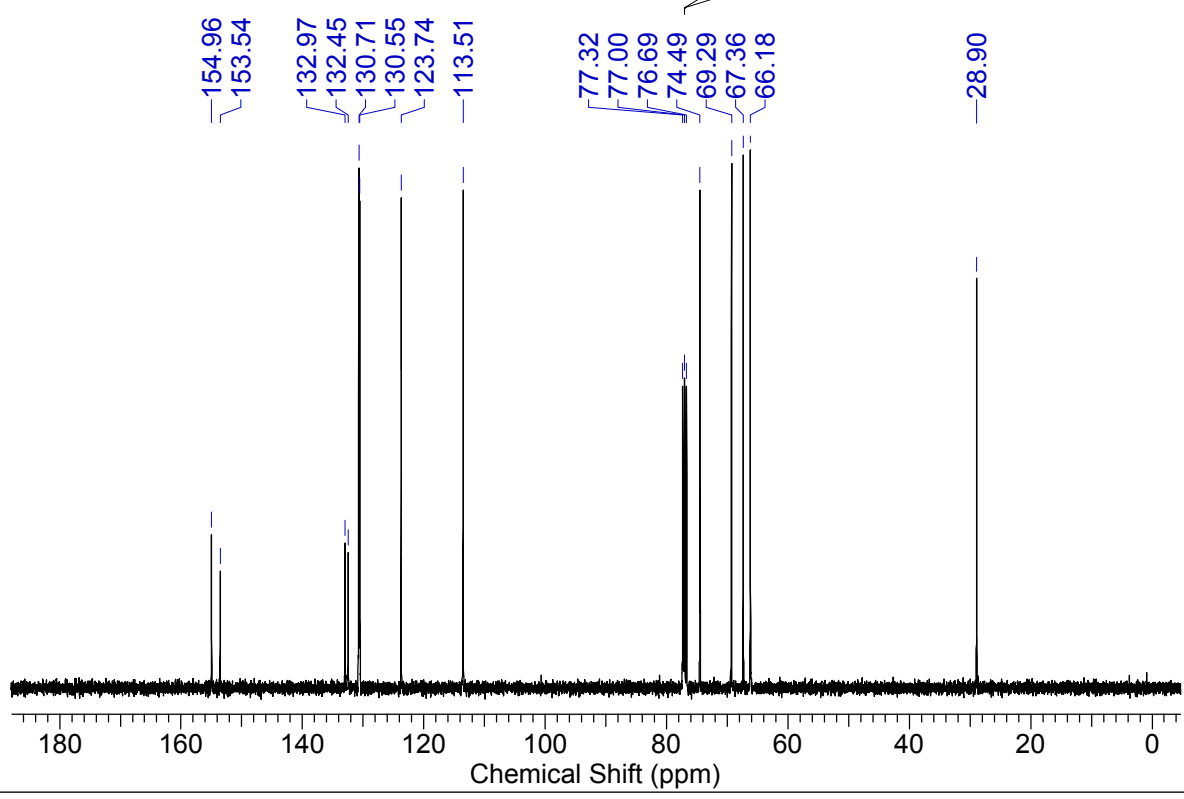

3-(1,4-dioxan-2-yl)-1-methylquinoxalin-2(1H)-one ( 6d)

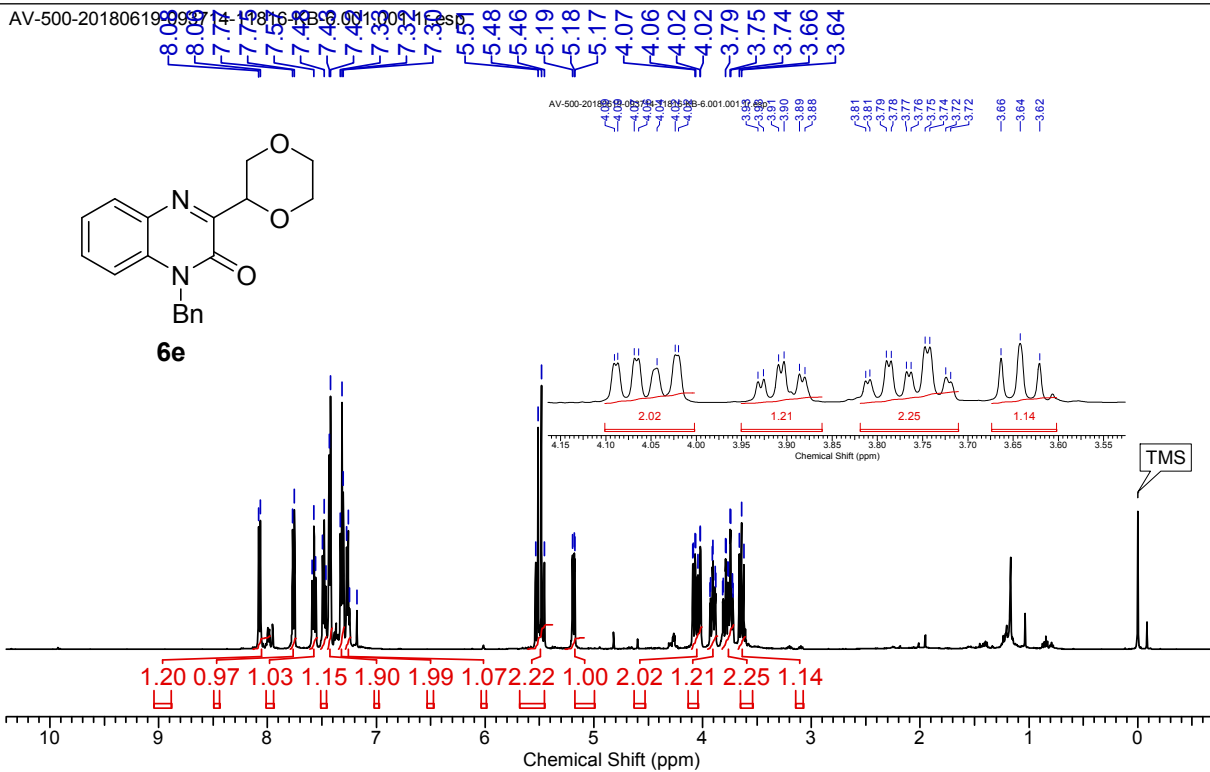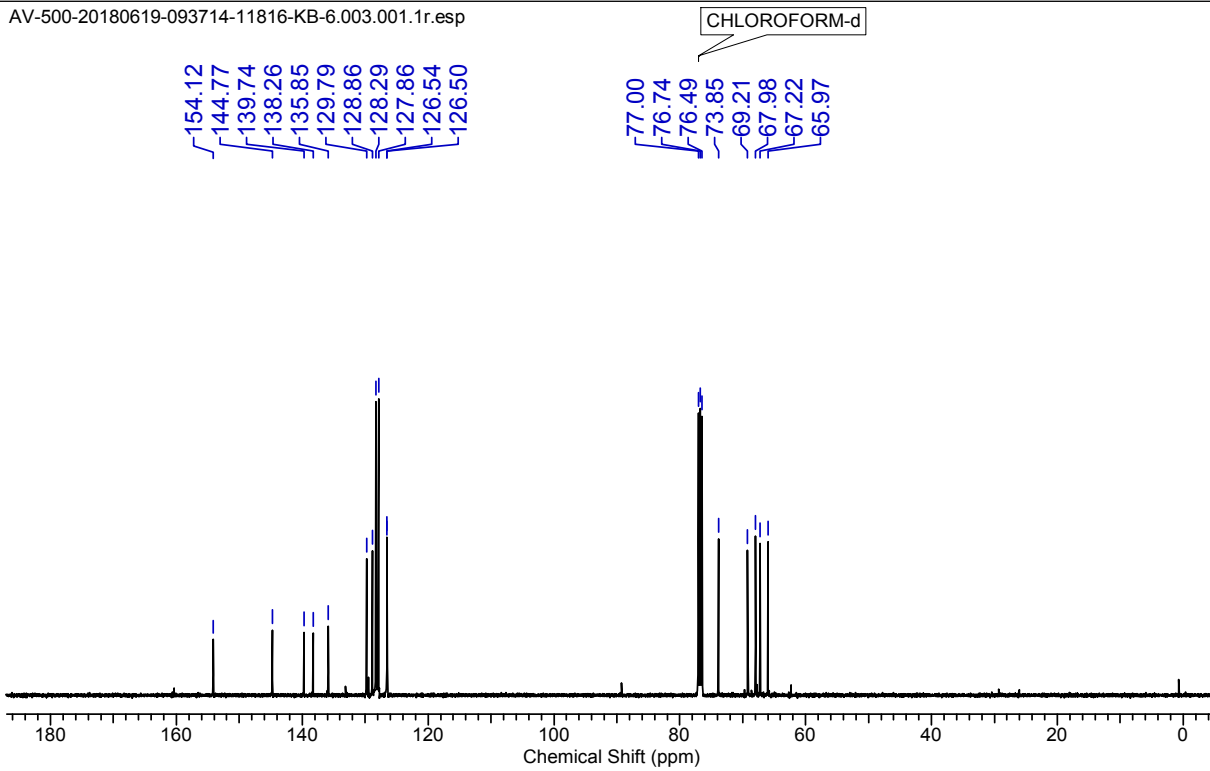

**1-benzyl-3-(1,4-dioxan-2-yl)quinoxalin-2(1H)-one(6e)**

AV-500-20180801-181112-11816-KB-10.001.001.1r.esp

TMS

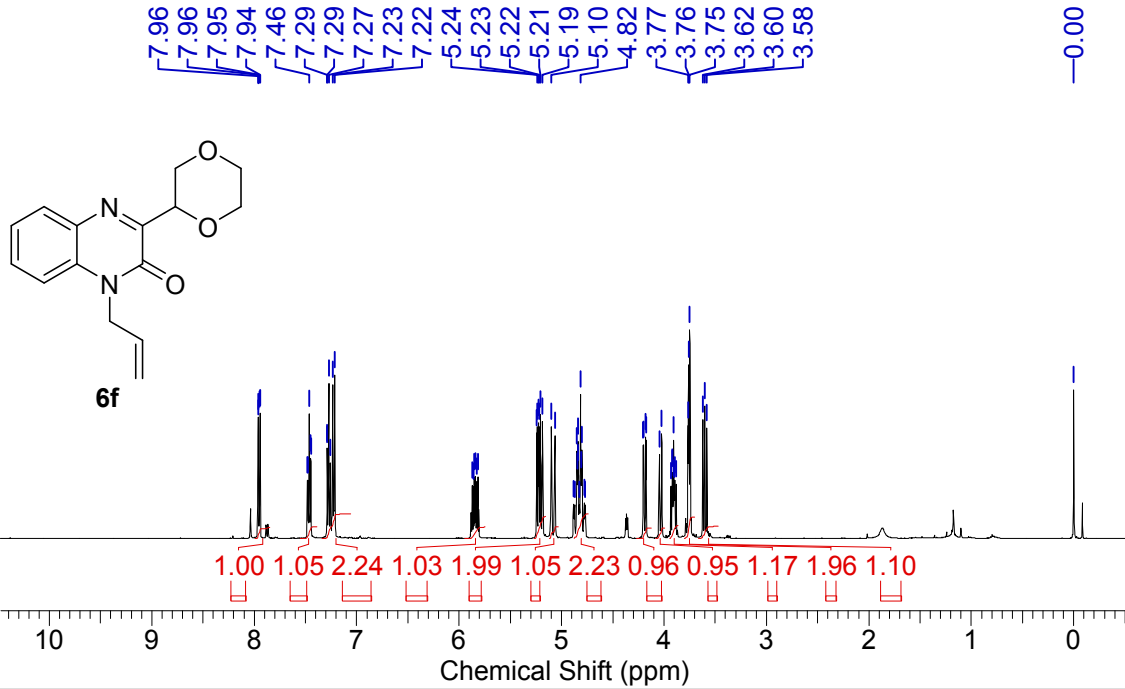

AV-500-20180801-181112-11816-KB-10.003.001.1r.esp

CHLOROFORM-d

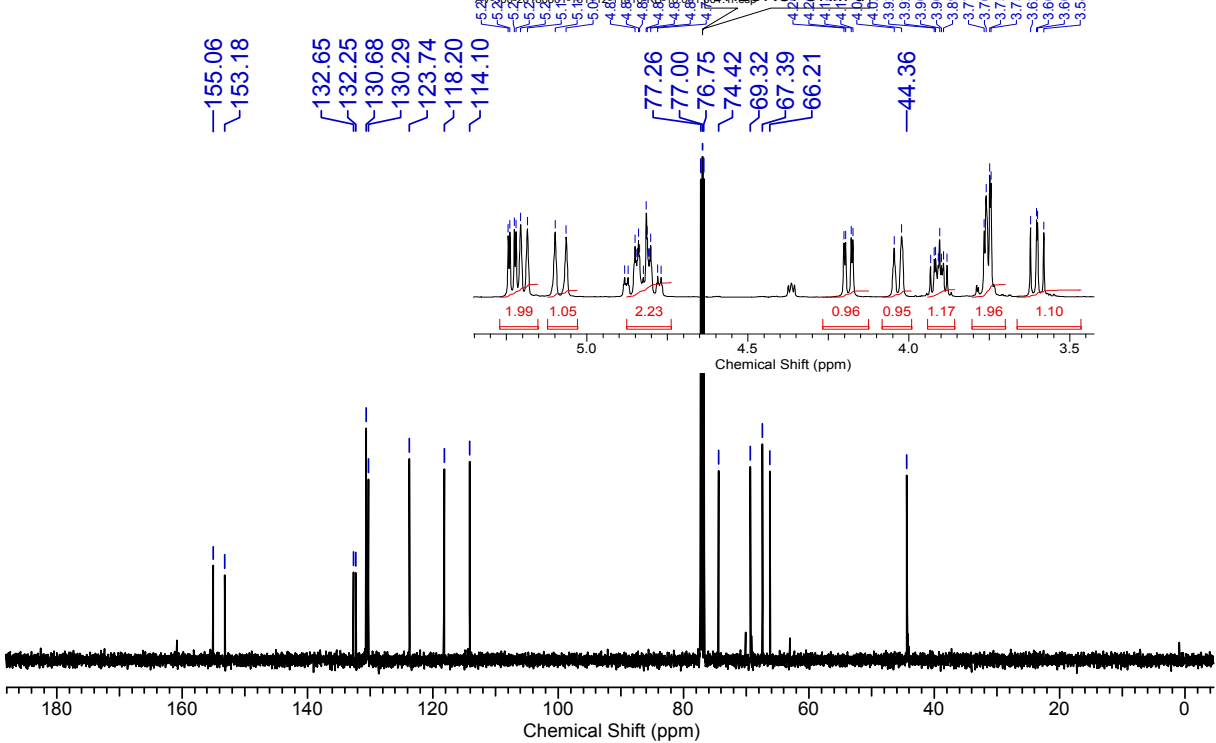

**1-allyl-3-(1,4-dioxan-2-yl)quinoxalin-2(1H)-one(6f)**

AV-500-20181123-100348-11816-KB-40.001.001.1r.esp

TMS

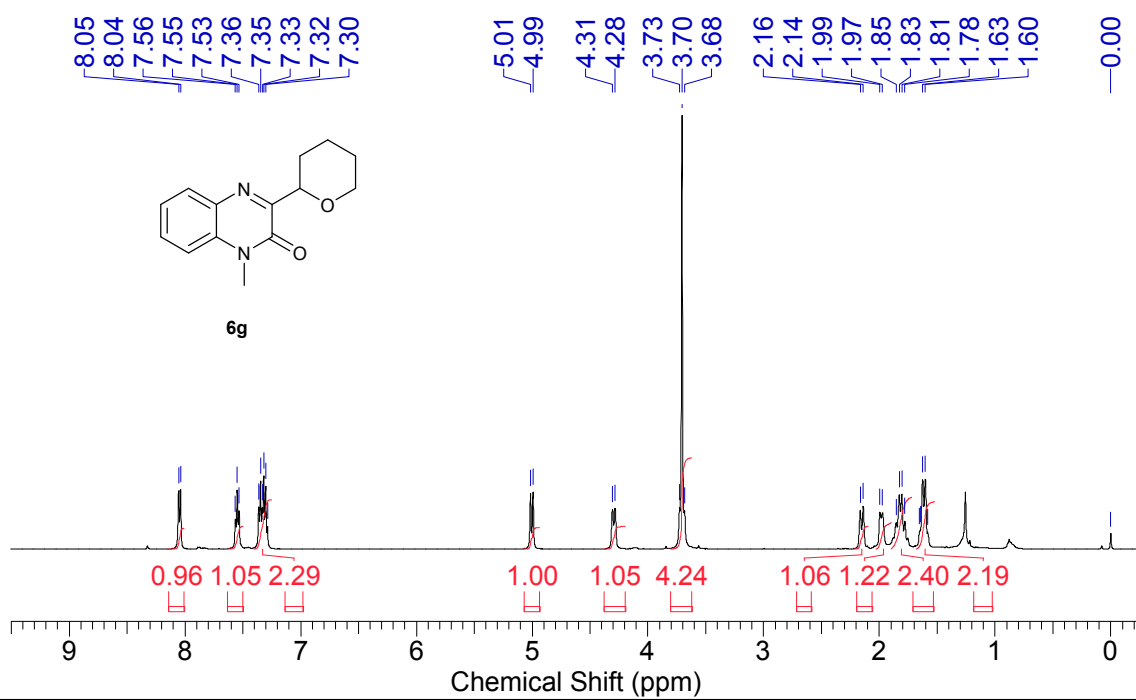

AV-500-20181123-100348-11816-KB-40.002.001.1r.esp

CHLOROFORM-d

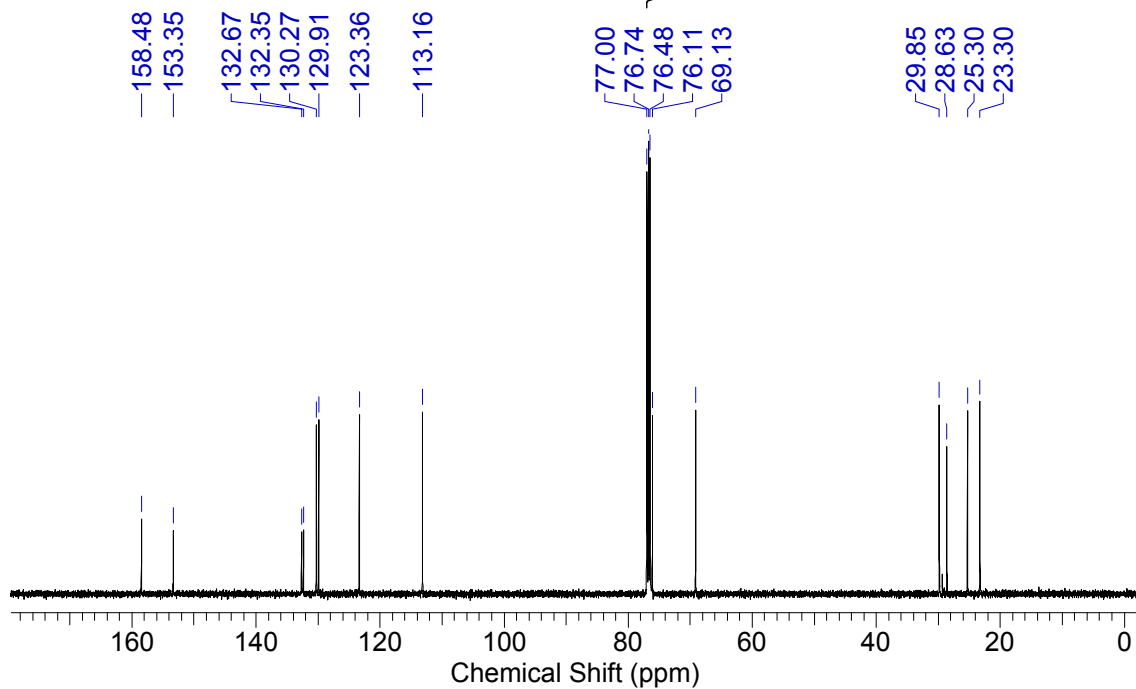

1-methyl-3-(tetrahydro-2H-pyran-2-yl)quinoxalin-2(1H)-one(6g)



AV-200-20181029-154107-11816-72-KB-37.001.001.1r.esp

TMS

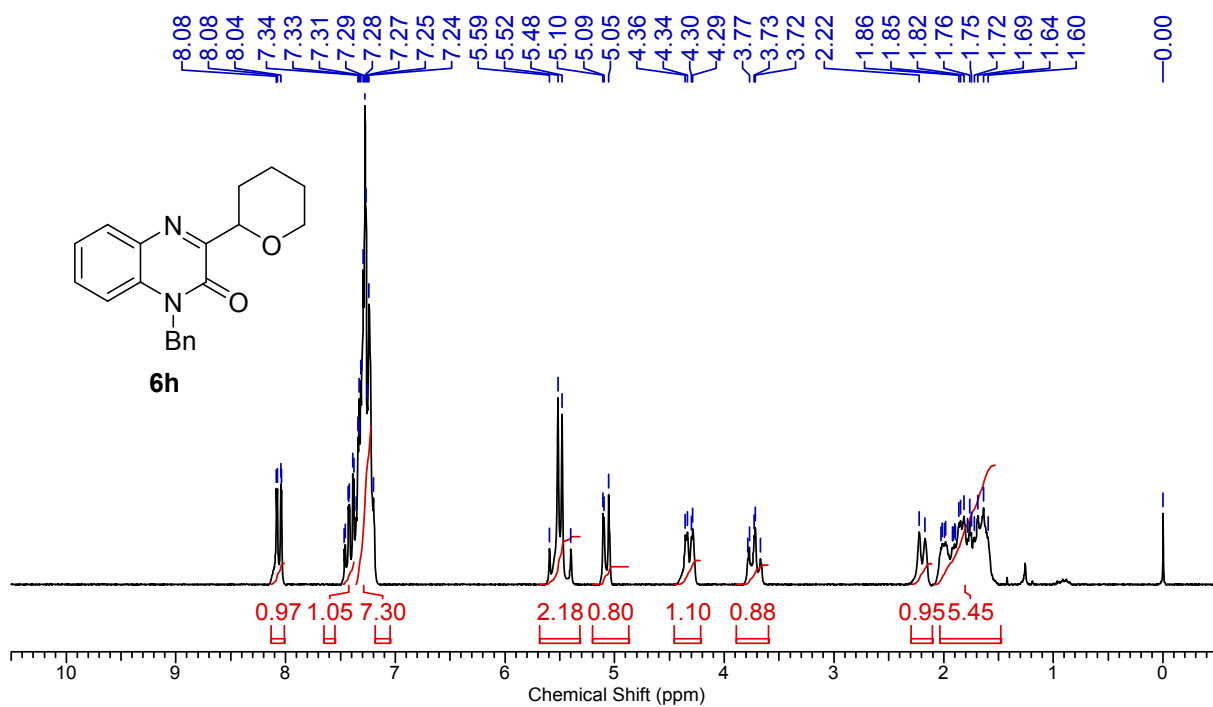

AV-200-20181031-134806-11816-6-KB-37.001.001.1r.esp

CHLOROFORM-d

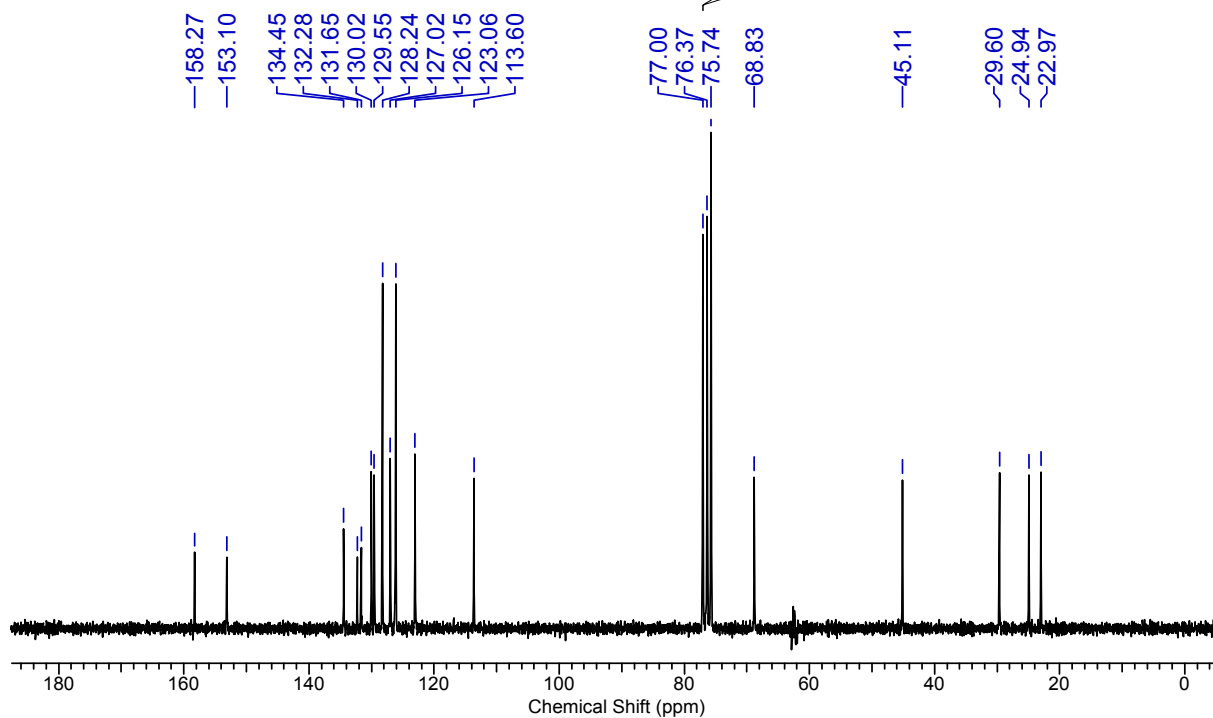

**1-benzyl-3-(tetrahydro-2H-pyran-2-yl)quinoxalin-2(1H)-one(6h)**

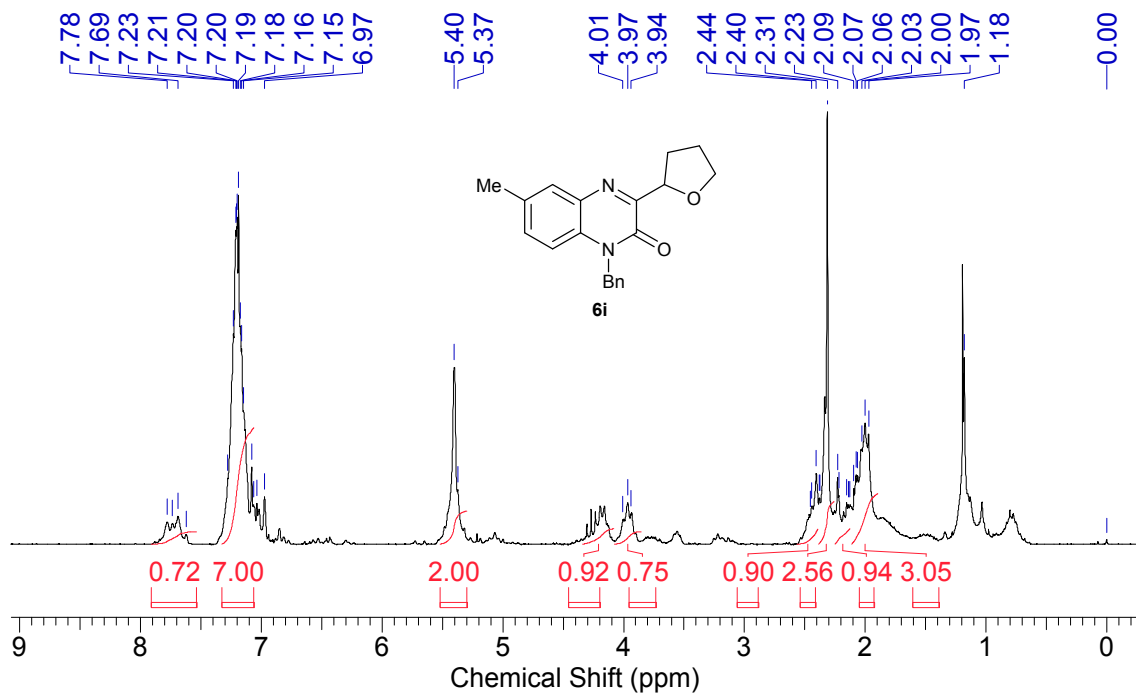

**1-methyl-3-(tetrahydrofuran-2-yl)quinoxalin-2(1H)-one(6i)**

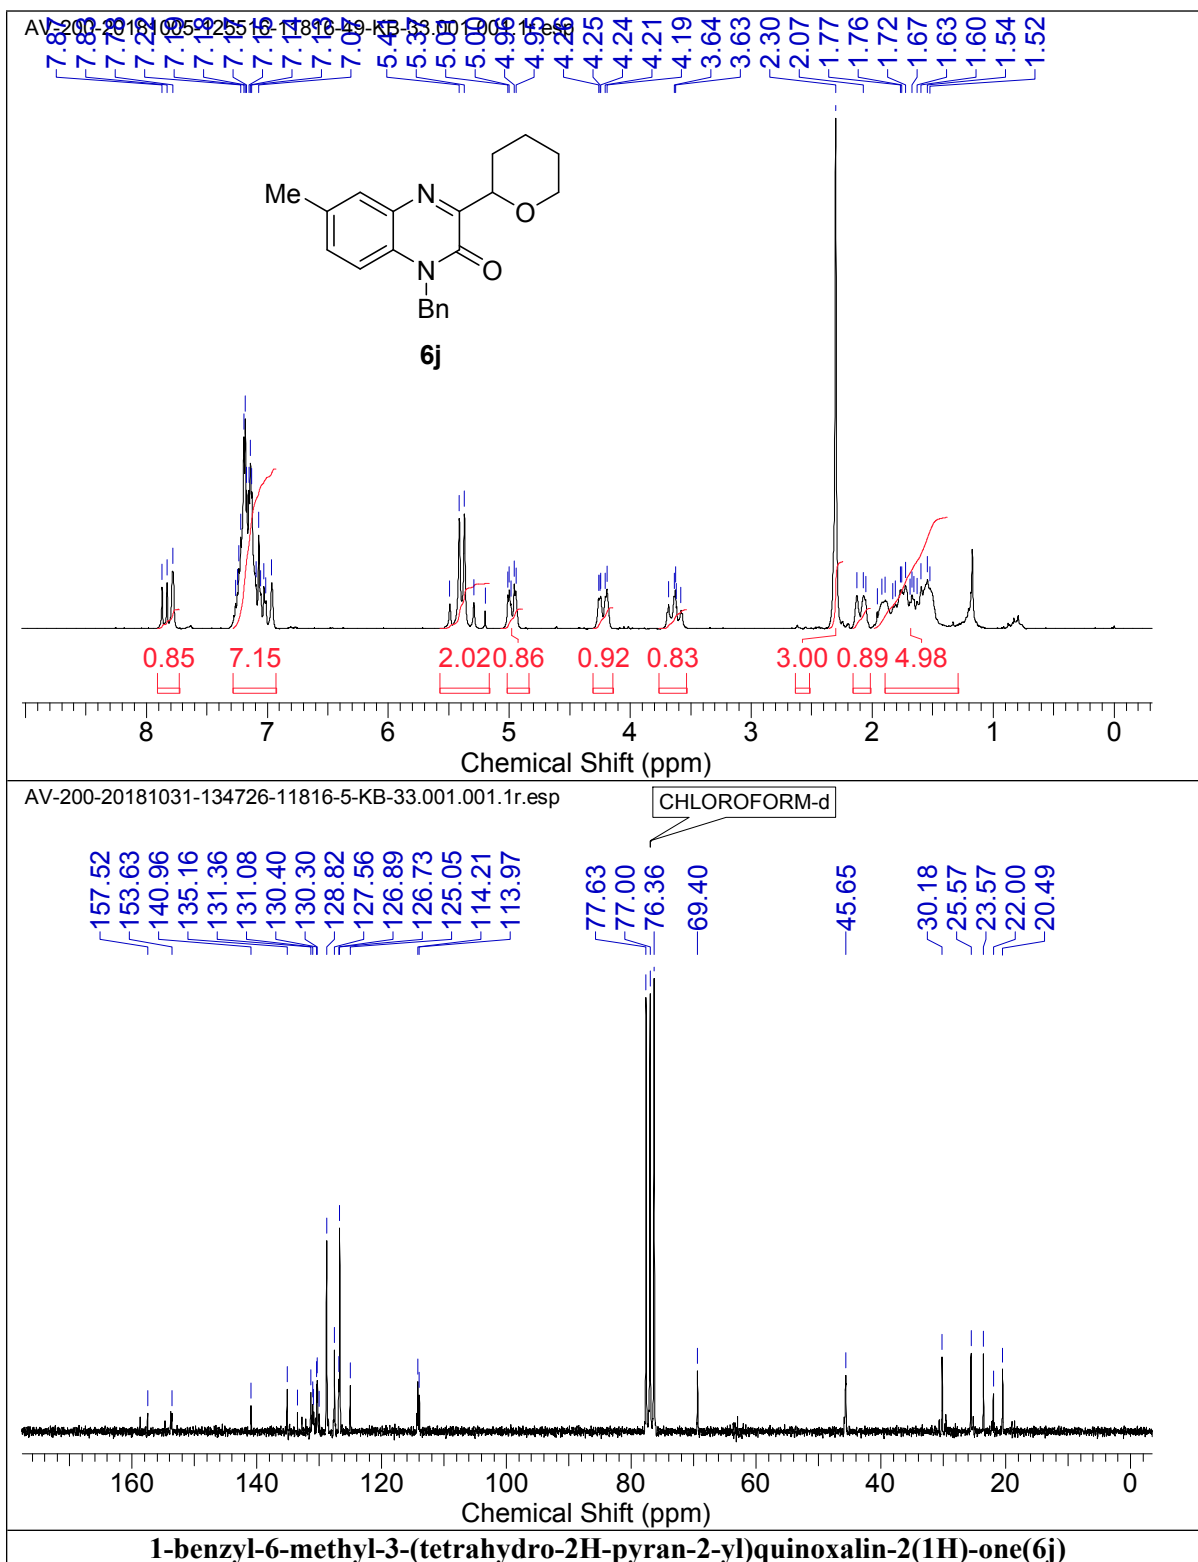

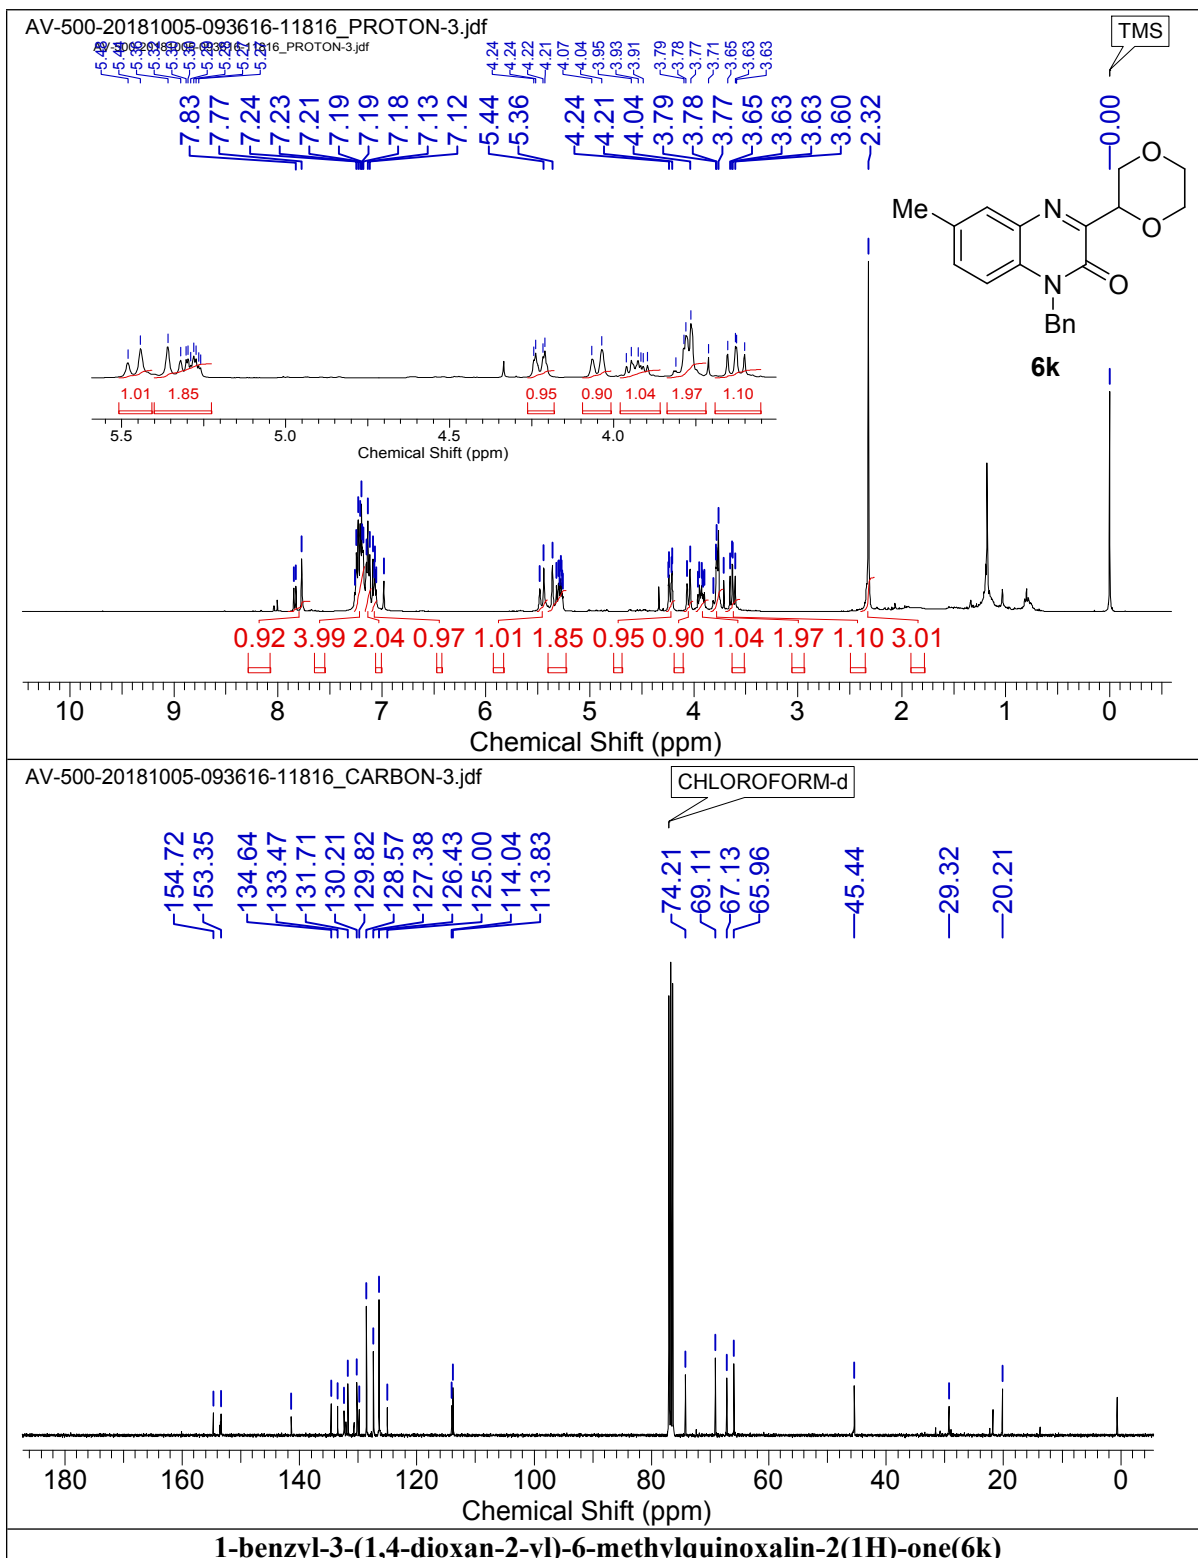

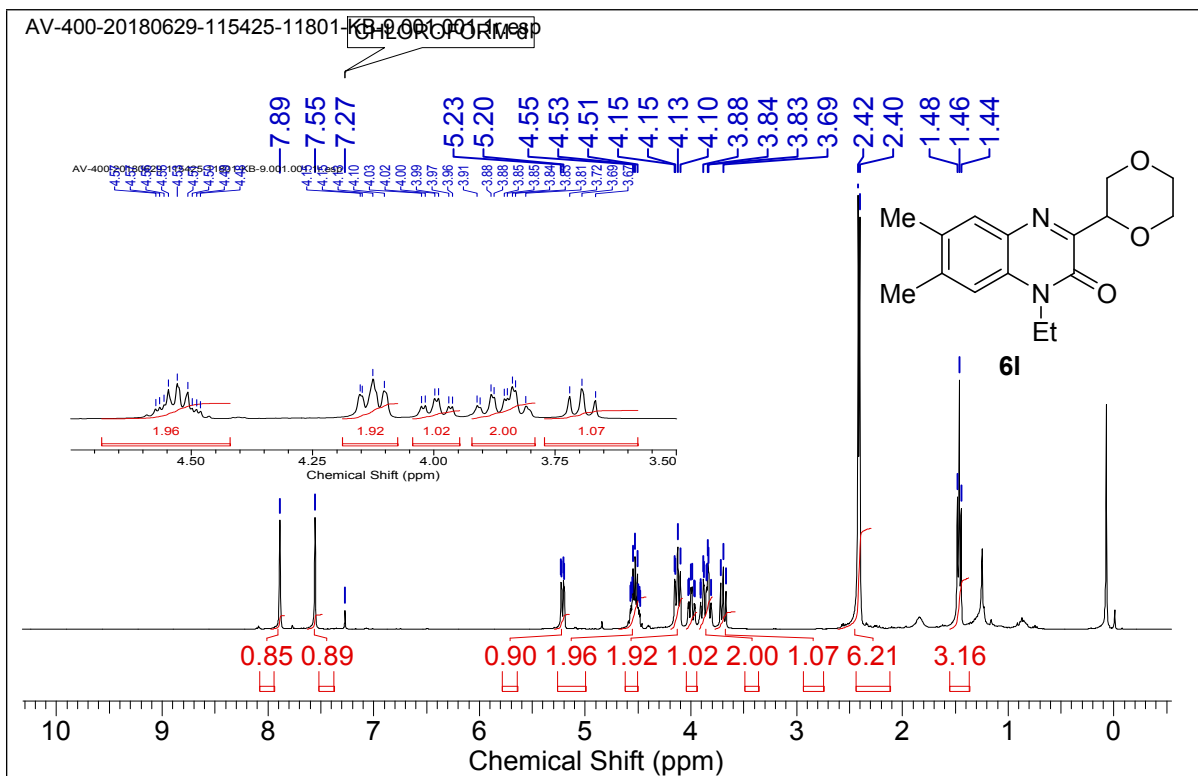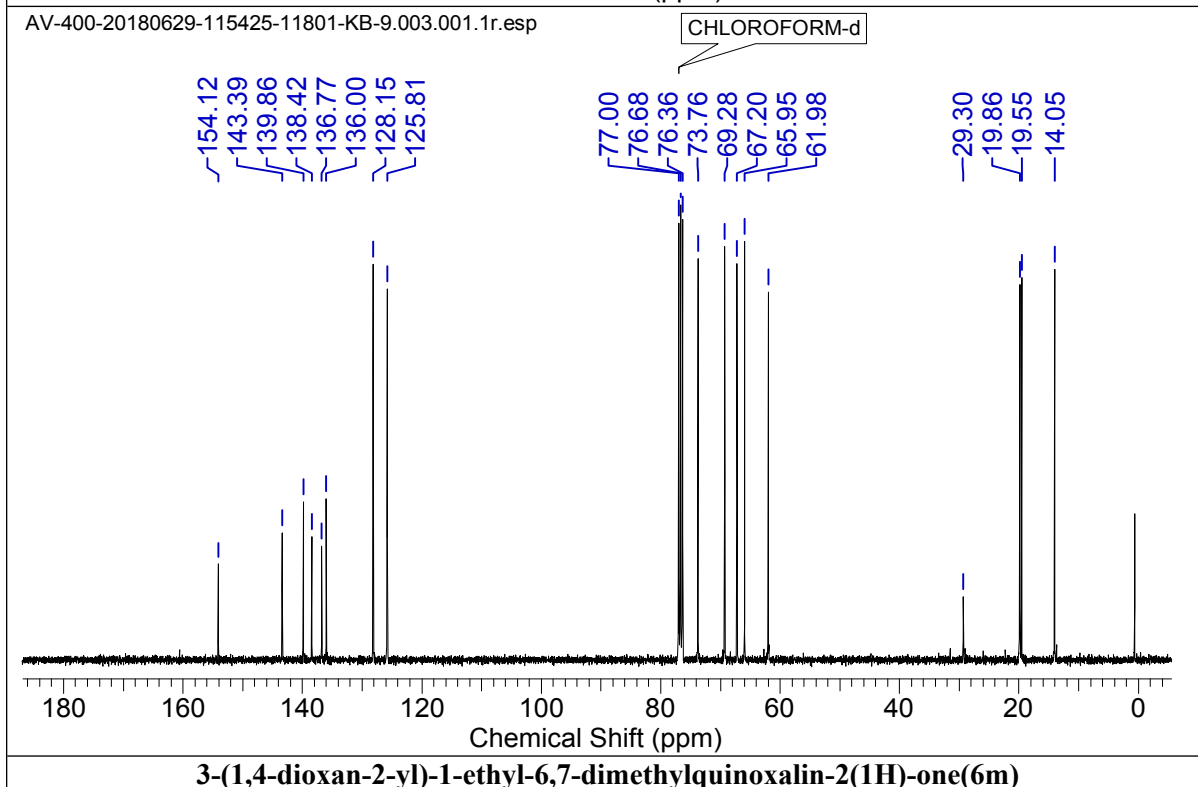

AV-200-20180620-120126-11816-39-KB-8.001.001.1r.esp  
7.79, 7.49, 5.39, 5.29, 5.27, 5.24, 4.51, 4.49, 4.47, 4.45, 4.44, 4.42, 4.40, 4.21, 4.18, 4.17, 4.45, 4.14, 4.44, 4.18, 4.11, 4.17, 4.14, 3.96, 2.35, 2.34, 2.05, 2.03, 2.01, 2.01, 2.00, 1.97, 1.42, 1.39, 1.35

AV-200-20180620-120126-11816-39-KB-8.001.001.1r.esp  
5.39, 5.29, 5.27, 5.24, 4.51, 4.49, 4.47, 4.45, 4.44, 4.42, 4.40, 4.21, 4.18, 4.17, 4.45, 4.14, 4.44, 4.18, 4.11, 4.17, 4.14, 3.96, 3.96, 3.93, 3.92, 3.89

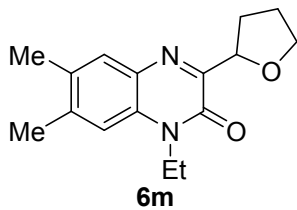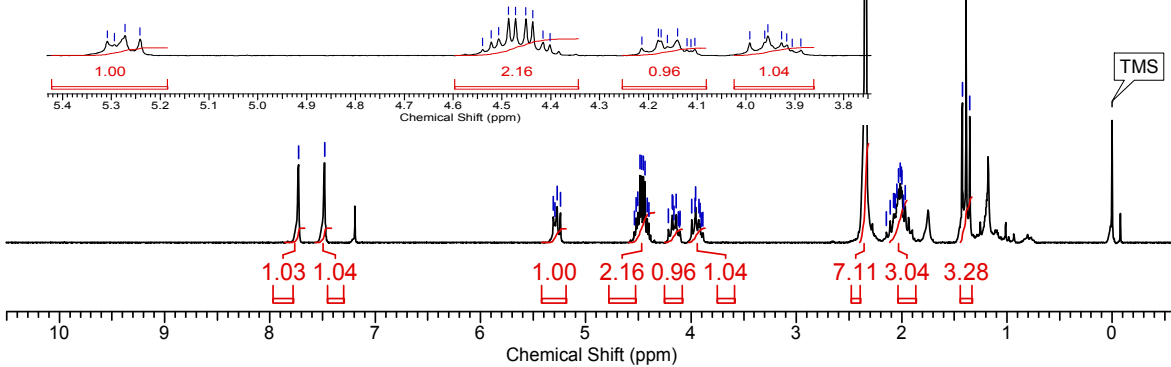

AV-400-20180627-092207-12816-KB-8.003.001.1r.esp  
154.99, 148.58, 139.45, 138.75, 136.89, 135.99, 128.49, 126.11, 77.36, 77.25, 77.04, 76.73, 69.11, 62.11, 30.65, 25.89, 20.19, 19.89, 14.46

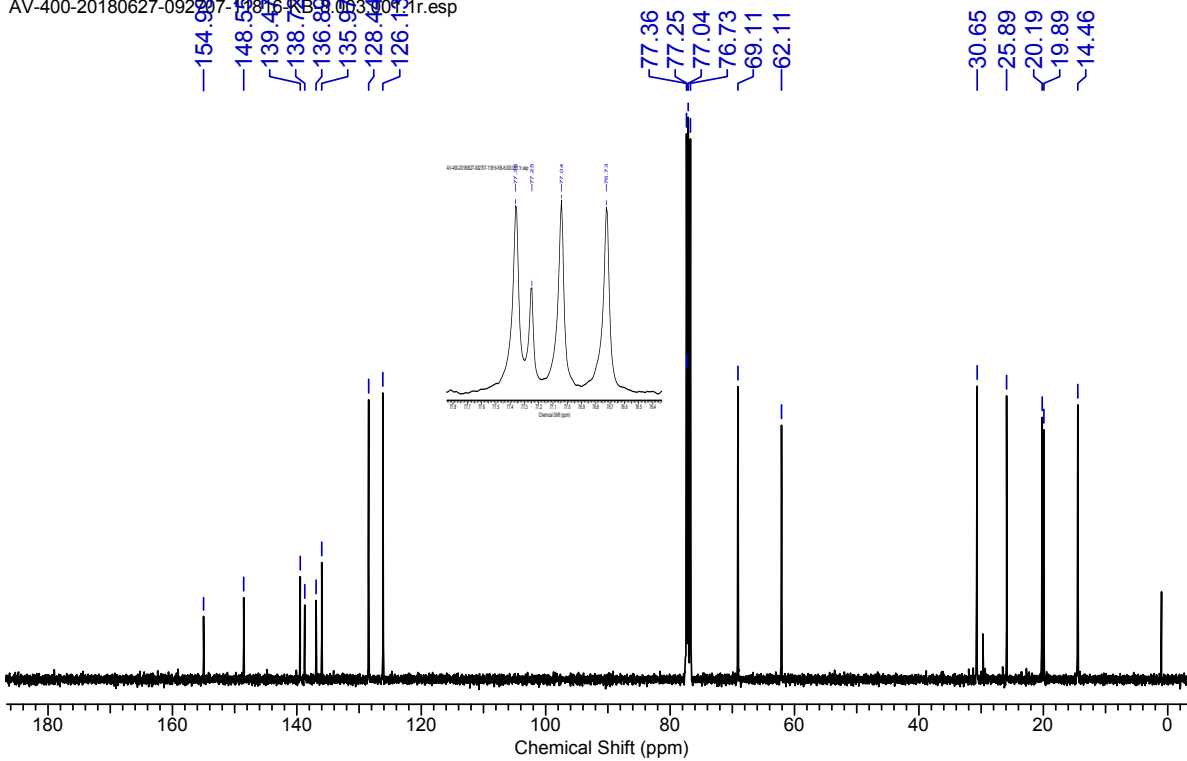

**1-ethyl-6,7-dimethyl-3-(tetrahydrofuran-2-yl)quinoxalin-2(1H)-one(6n)**

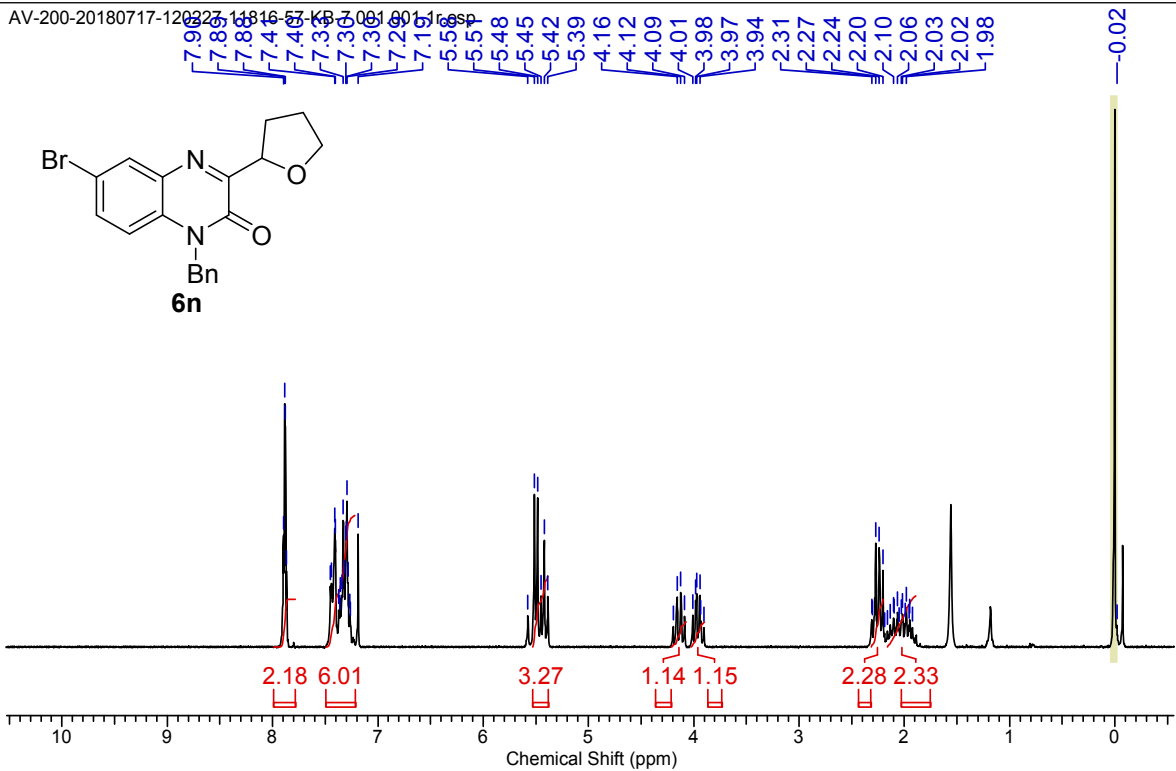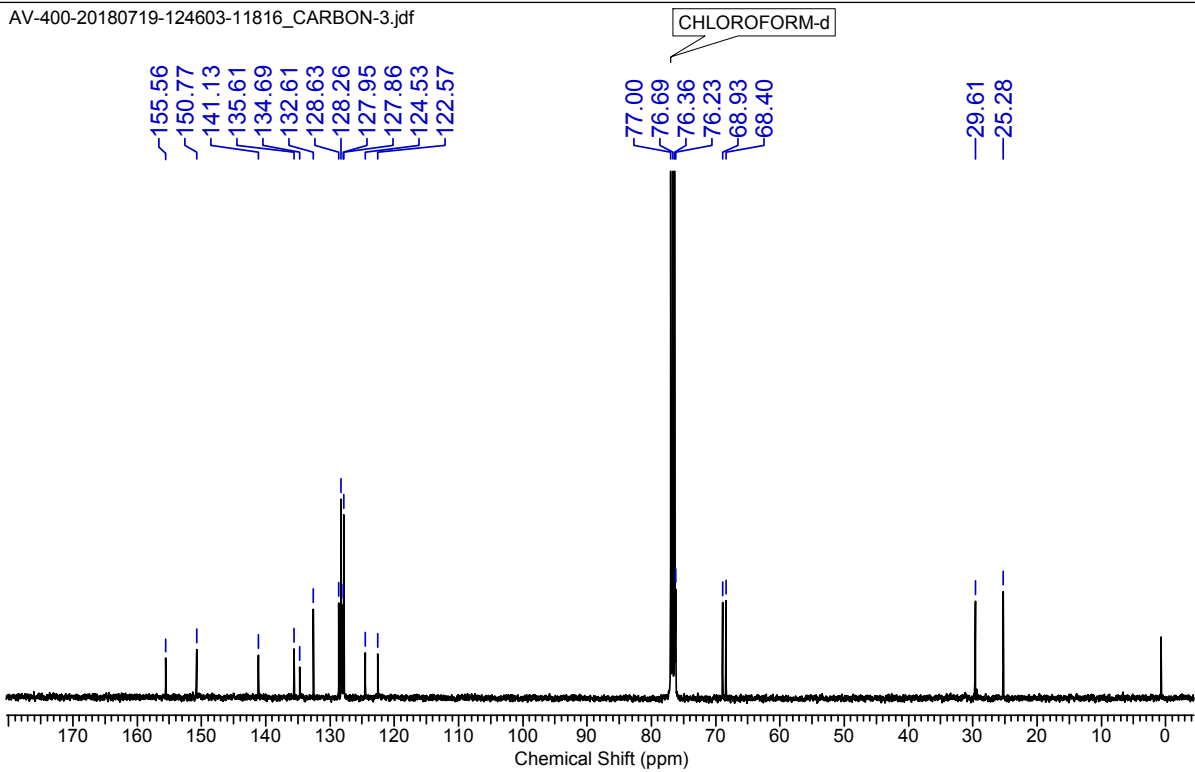

**1-benzyl-6-bromo-3-(tetrahydrofuran-2-yl)quinoxalin-2(1H)-one(6o)**

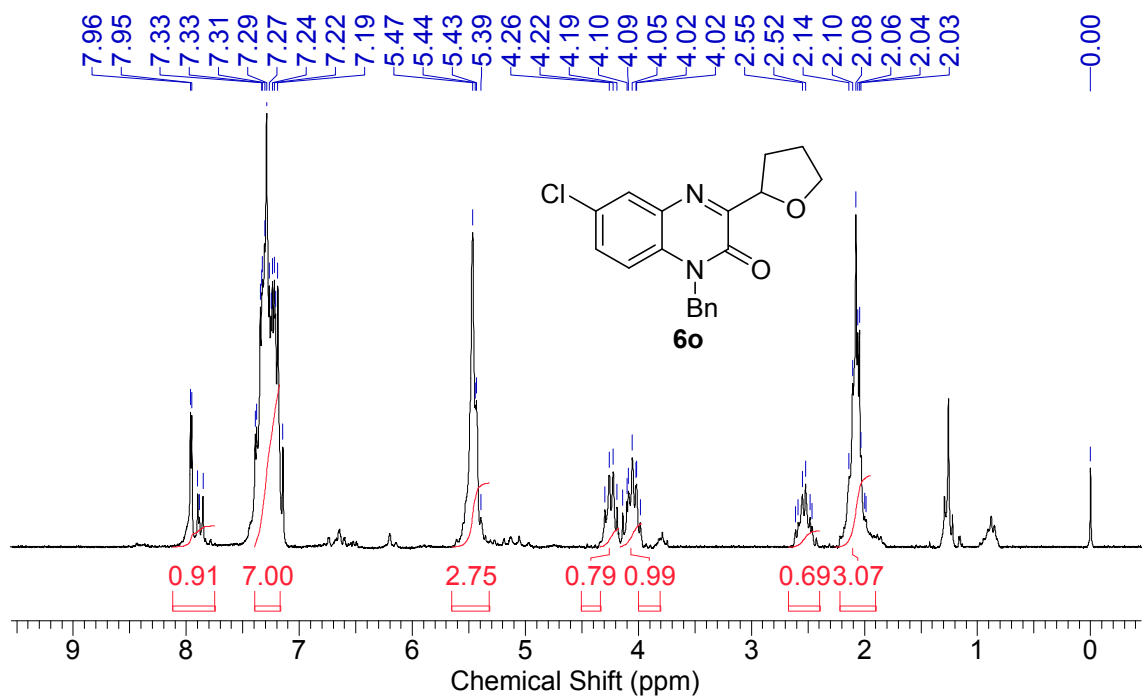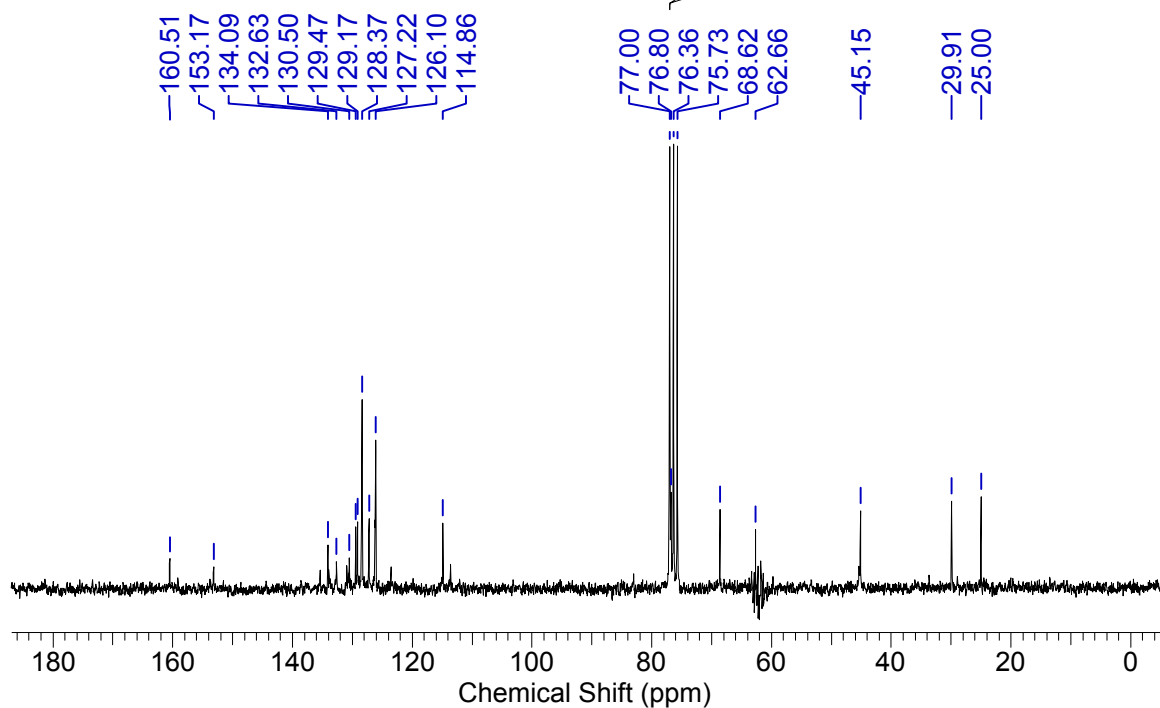

**1-benzyl-6-chloro-3-(tetrahydrofuran-2-yl)quinoxalin-2(1H)-one(6p)**



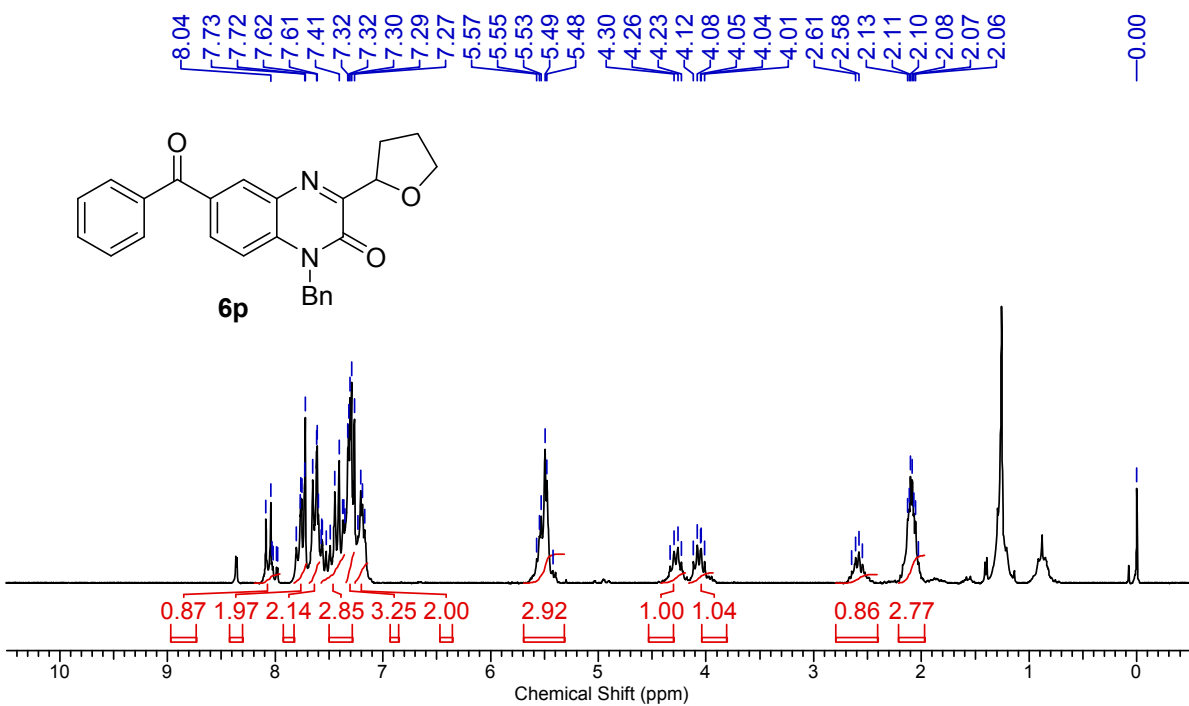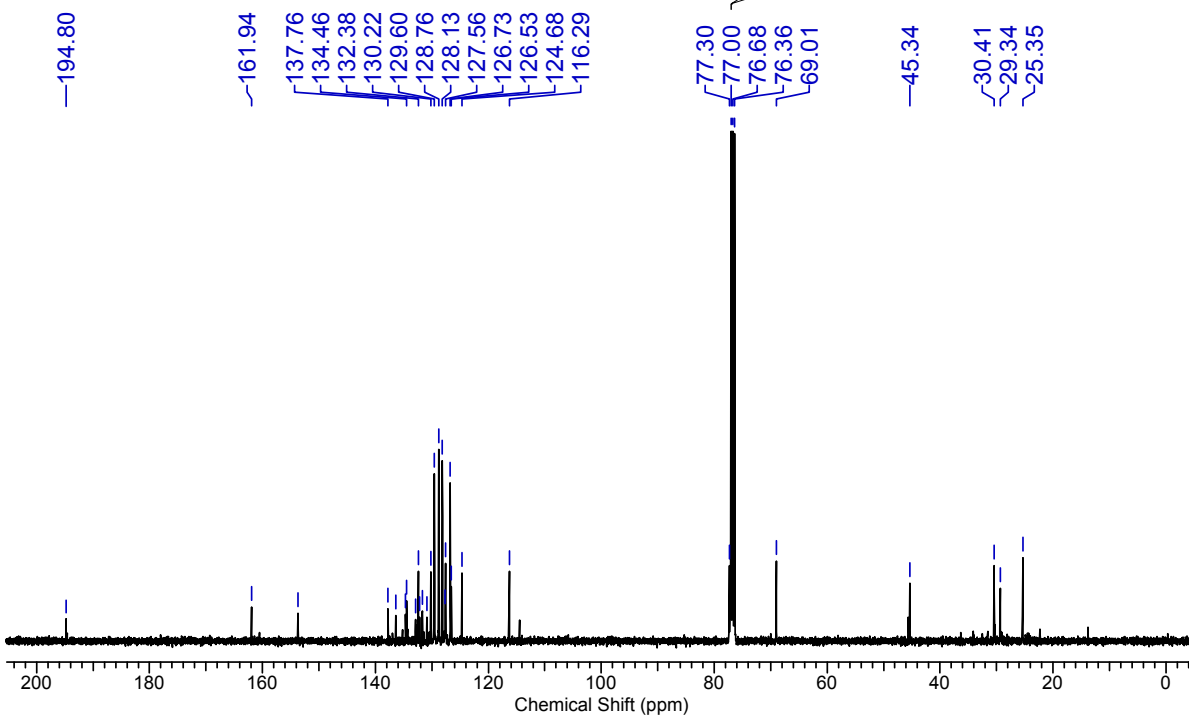

**6-benzoyl-1-benzyl-3-(tetrahydrofuran-2-yl)quinoxalin-2(1H)-one(6q)**

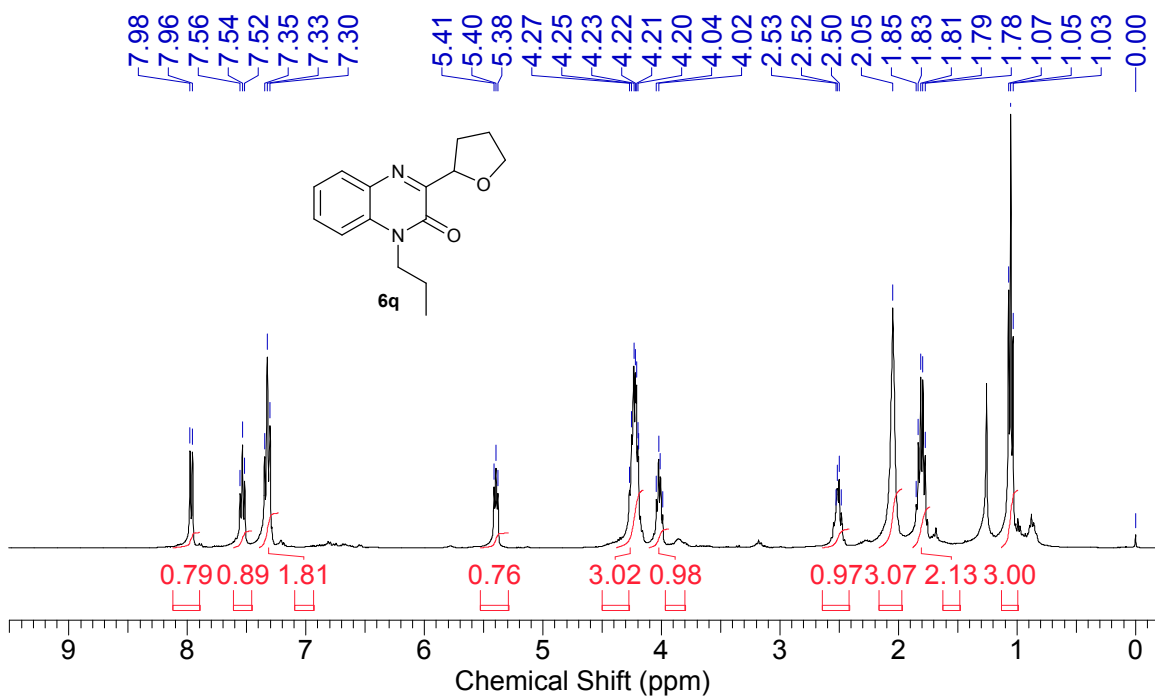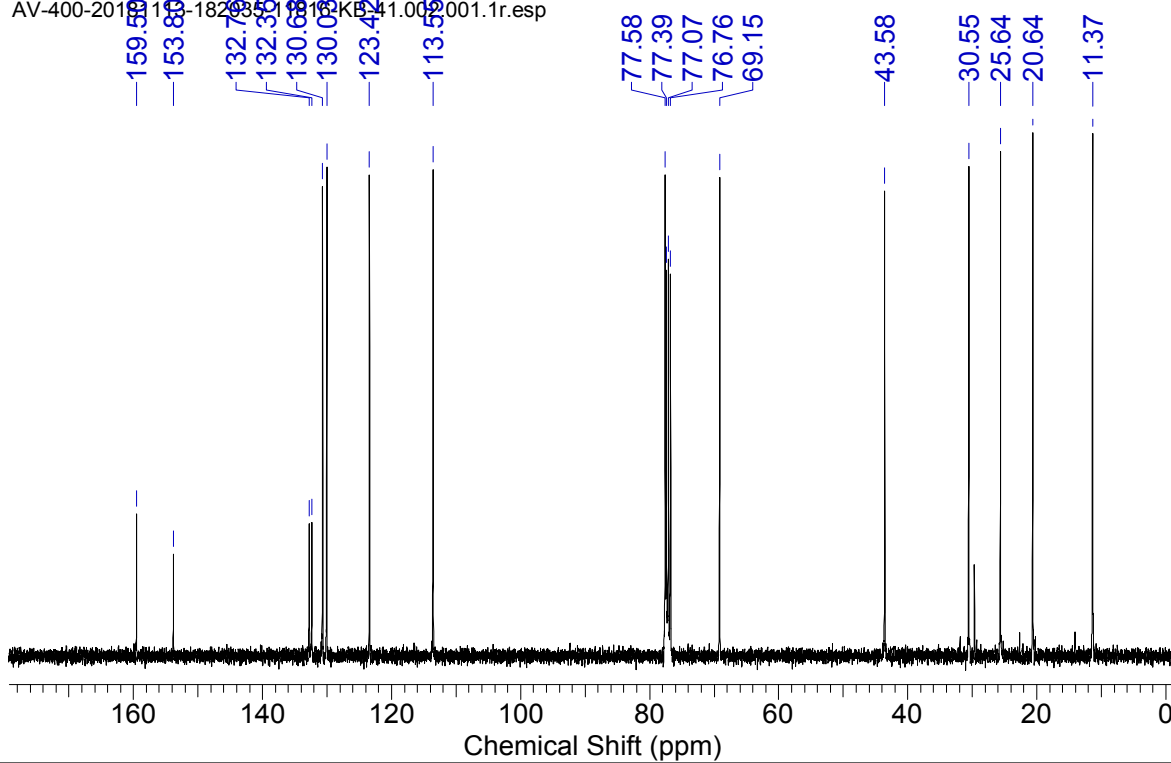

**1-propyl-3-(tetrahydrofuran-2-yl)quinoxalin-2(1H)-one(6r)**

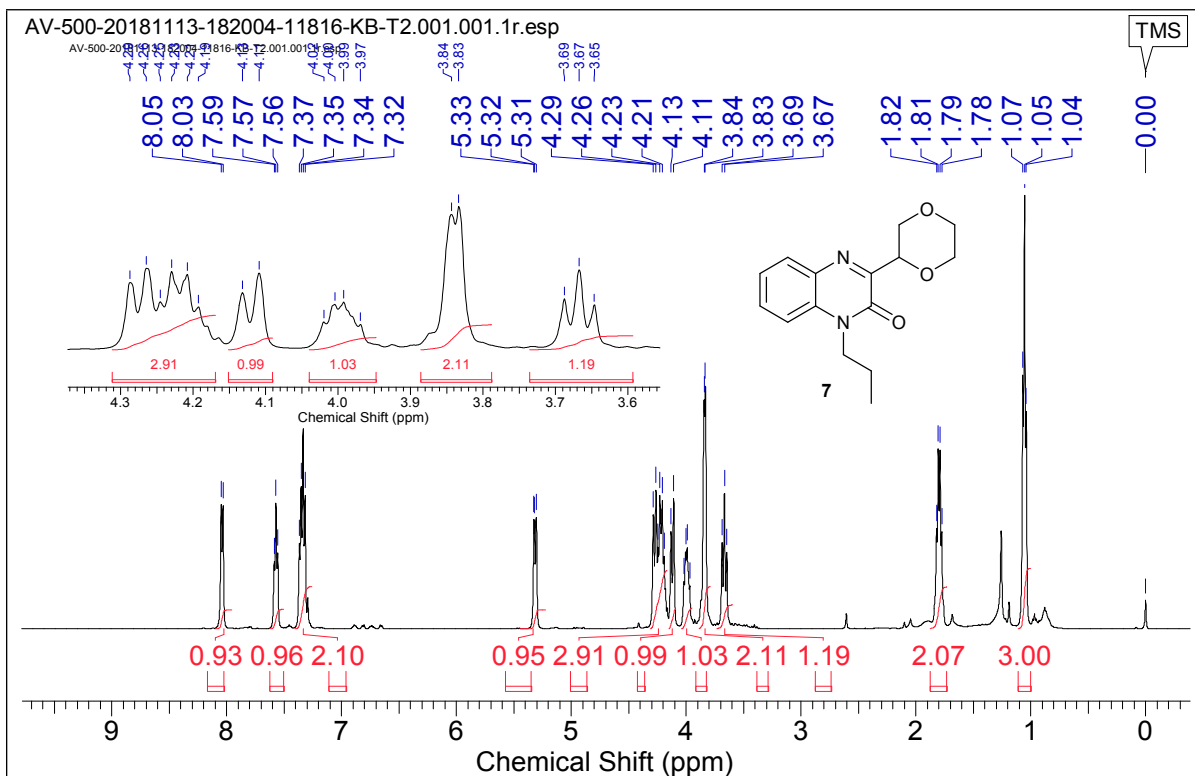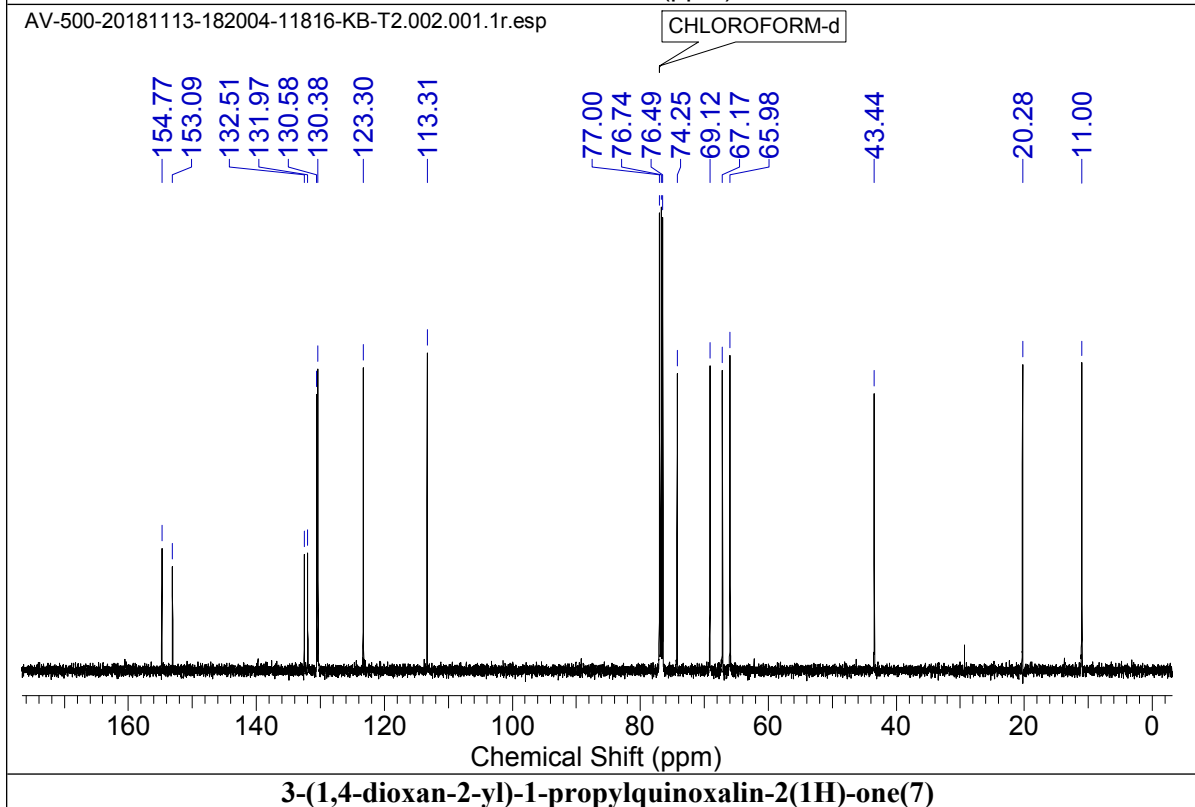

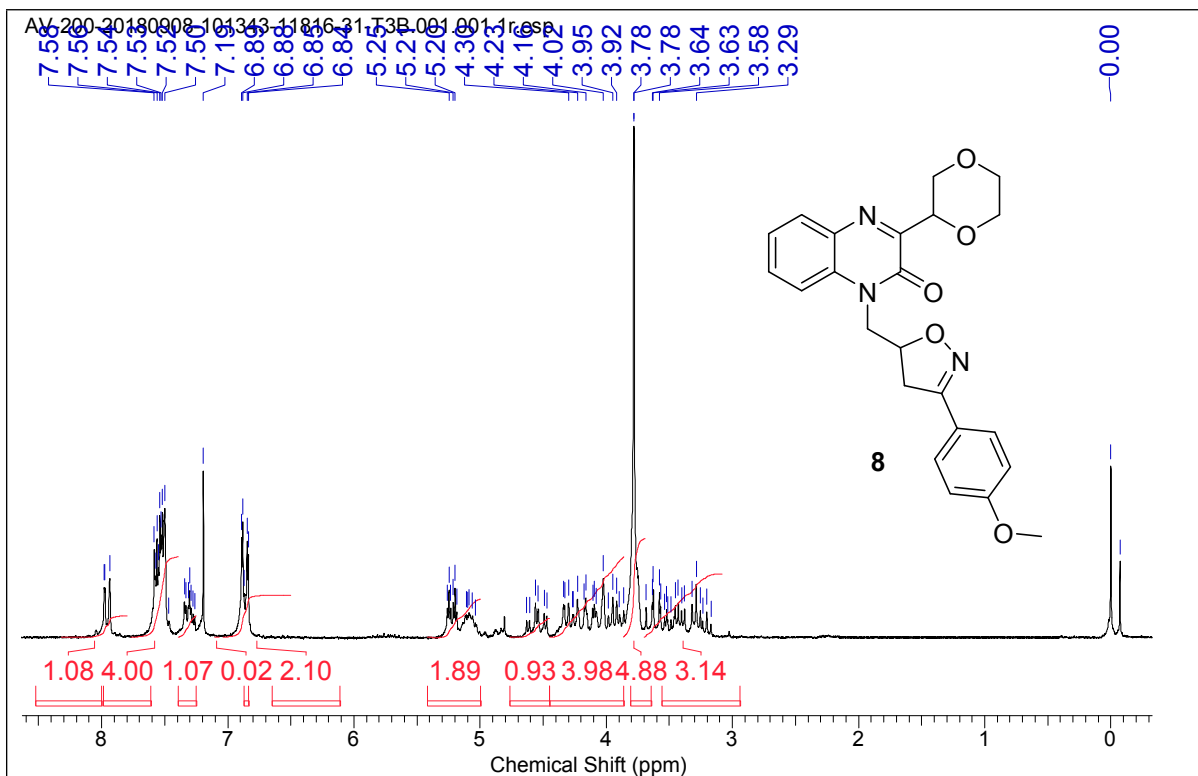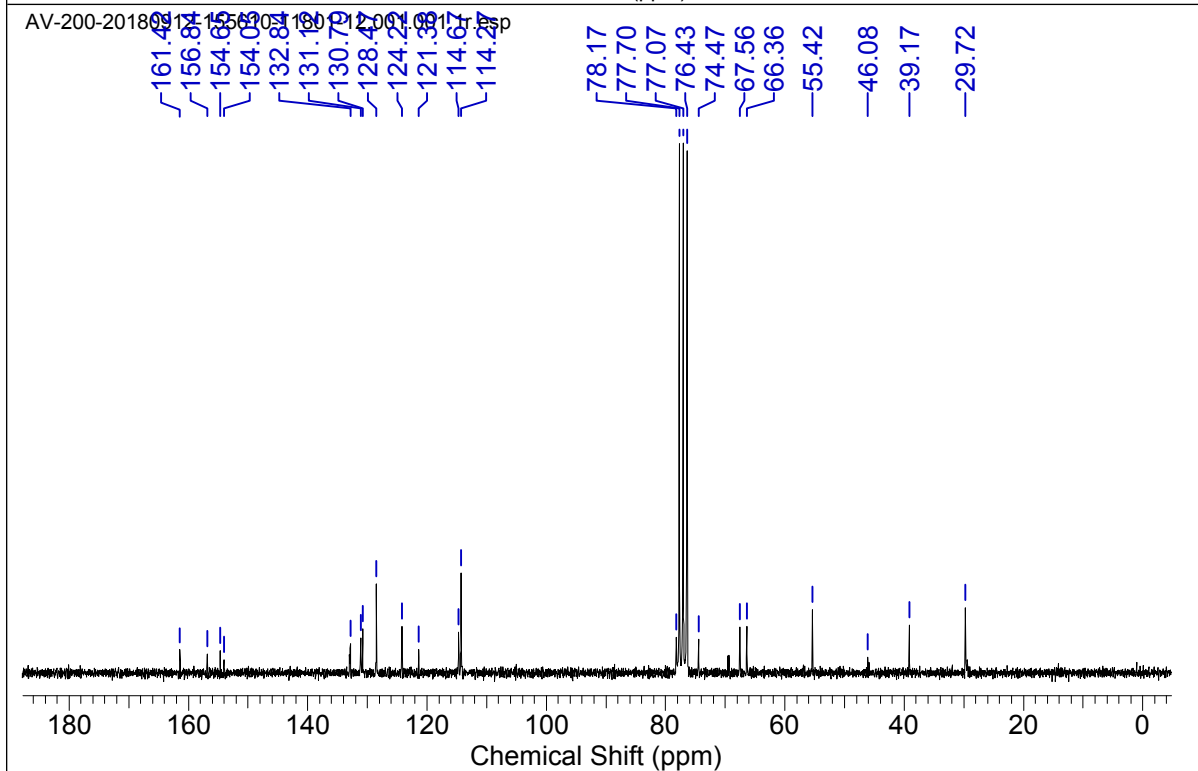

**3-(1,4-dioxan-2-yl)-1-((3-(4-methoxyphenyl)-4,5-dihydroisoxazol-5-yl)methyl)quinoxalin-2(1H)-one(8)**

AV-200-20180911-093435-11816-39.001.001.1r.esp

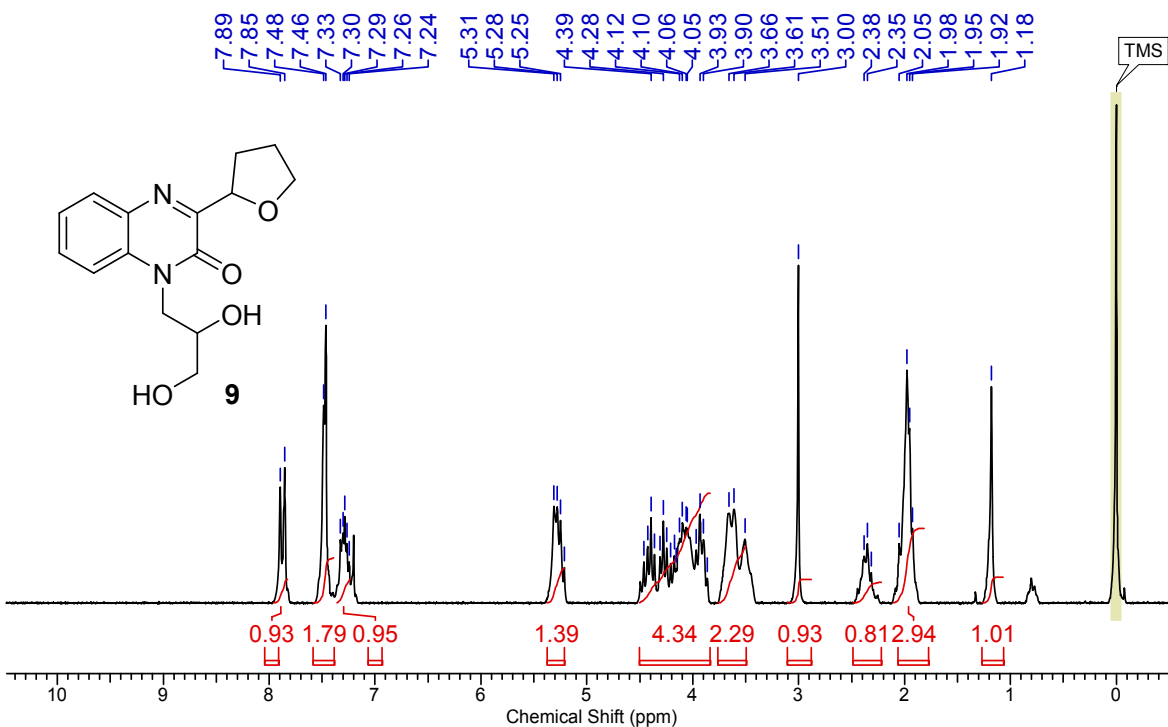

AV-200-20180912-155158-11816-10-T1.001.001.1r.esp

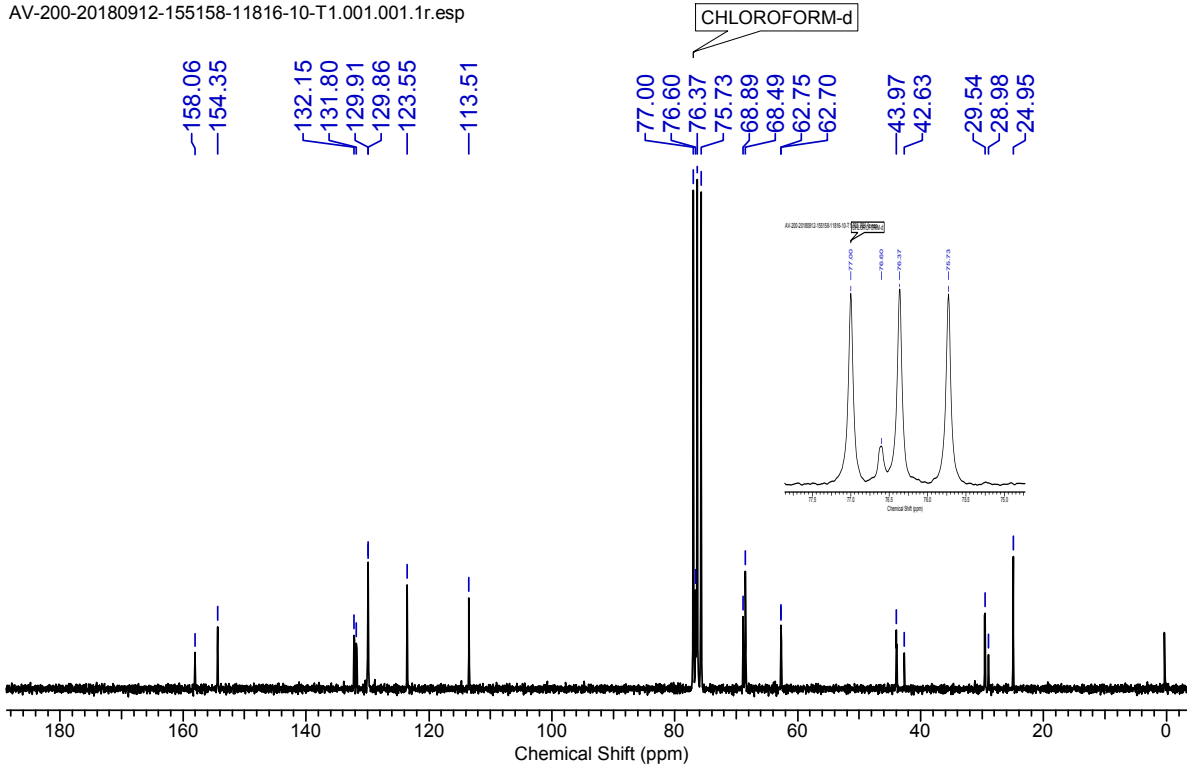

**1-(2,3-dihydroxypropyl)-3-(tetrahydrofuran-2-yl)quinoxalin-2(1H)-one(9)**

# HRMS Data:

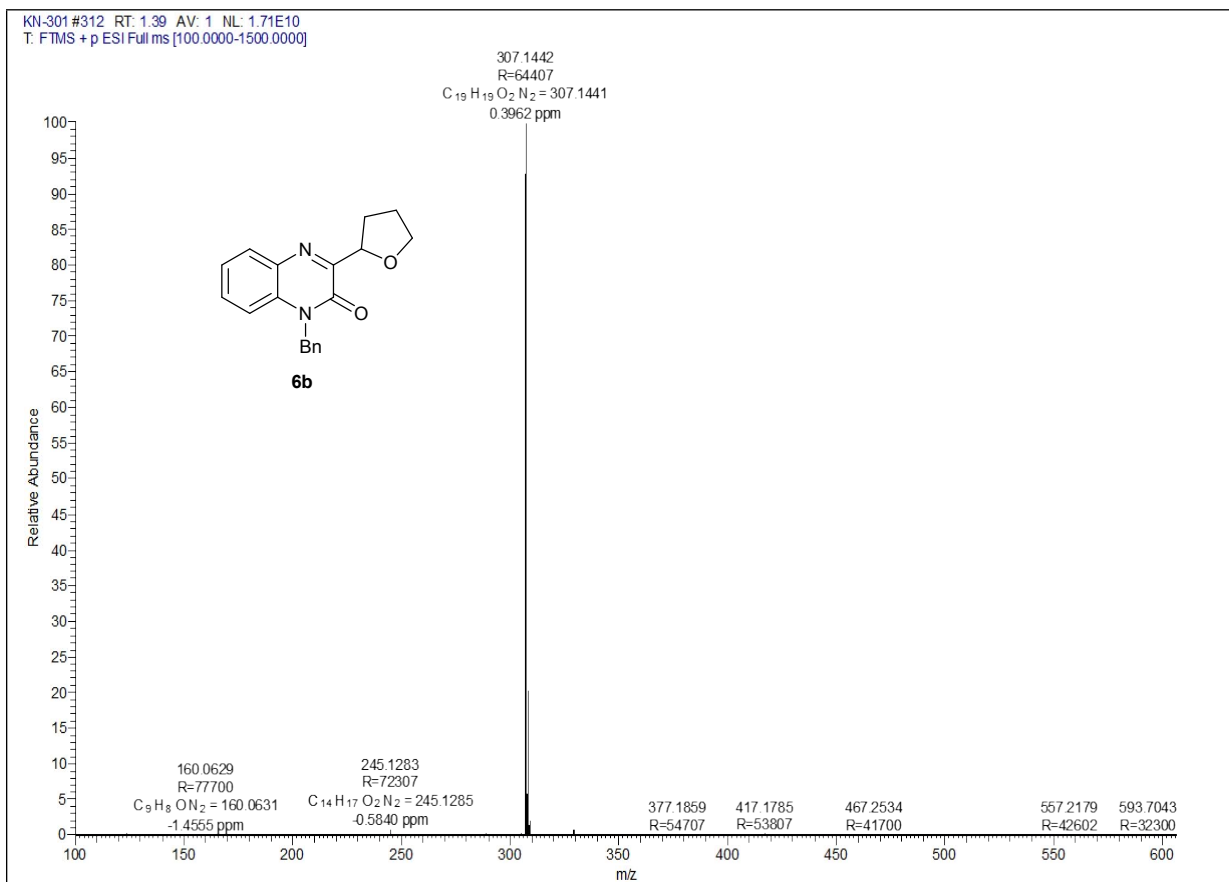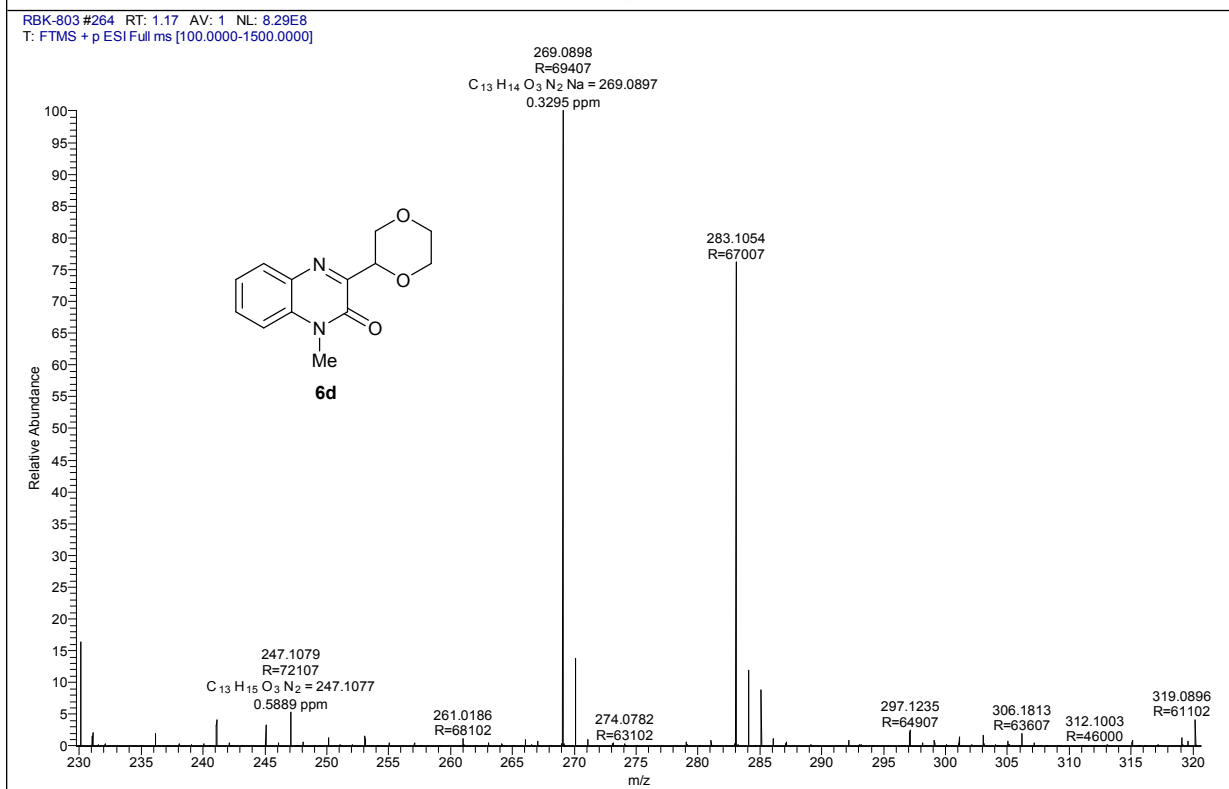

KN-303 #285 RT: 1.27 AV: 1 NL: 5.51E9  
T: FTMS + p ESI Full ms [100.0000-1500.0000]

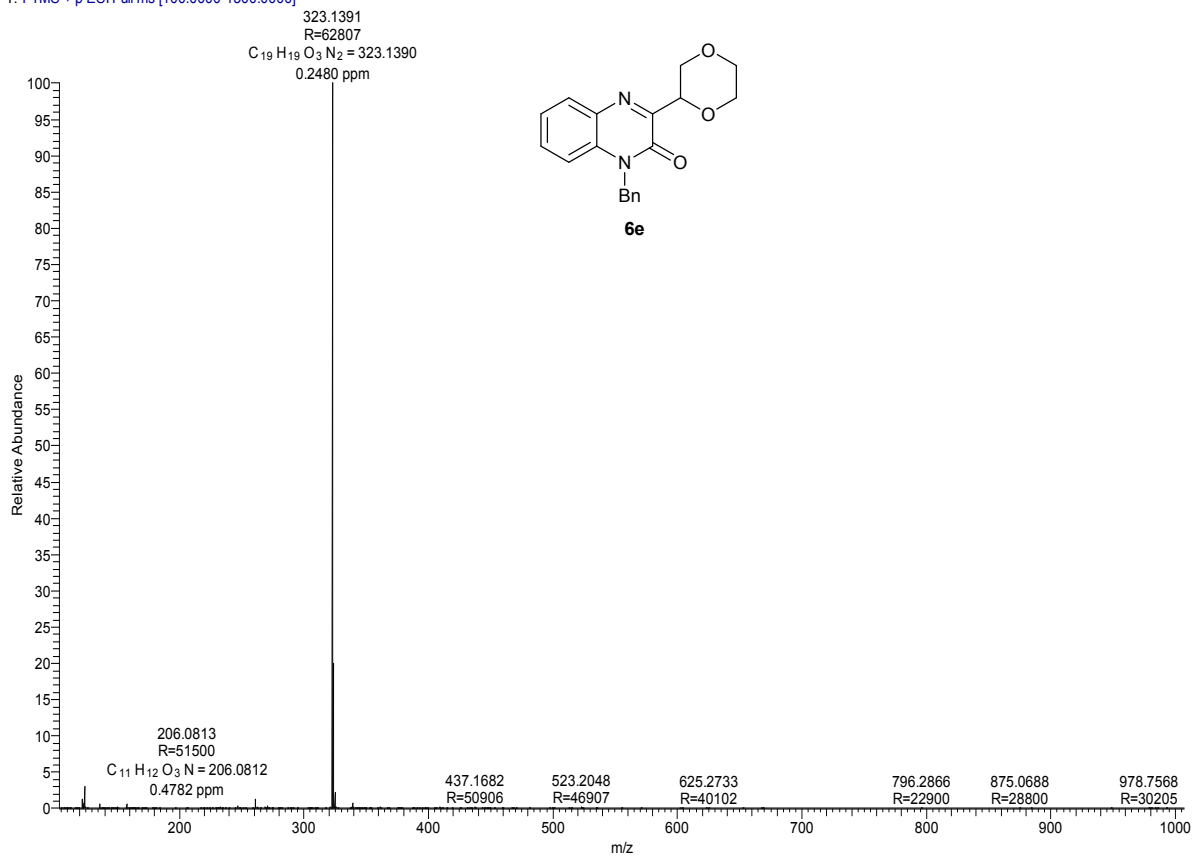

KB-40 #272 RT: 1.22 AV: 1 NL: 3.18E9  
T: FTMS + p ESI Full ms [133.4000-2000.0000]

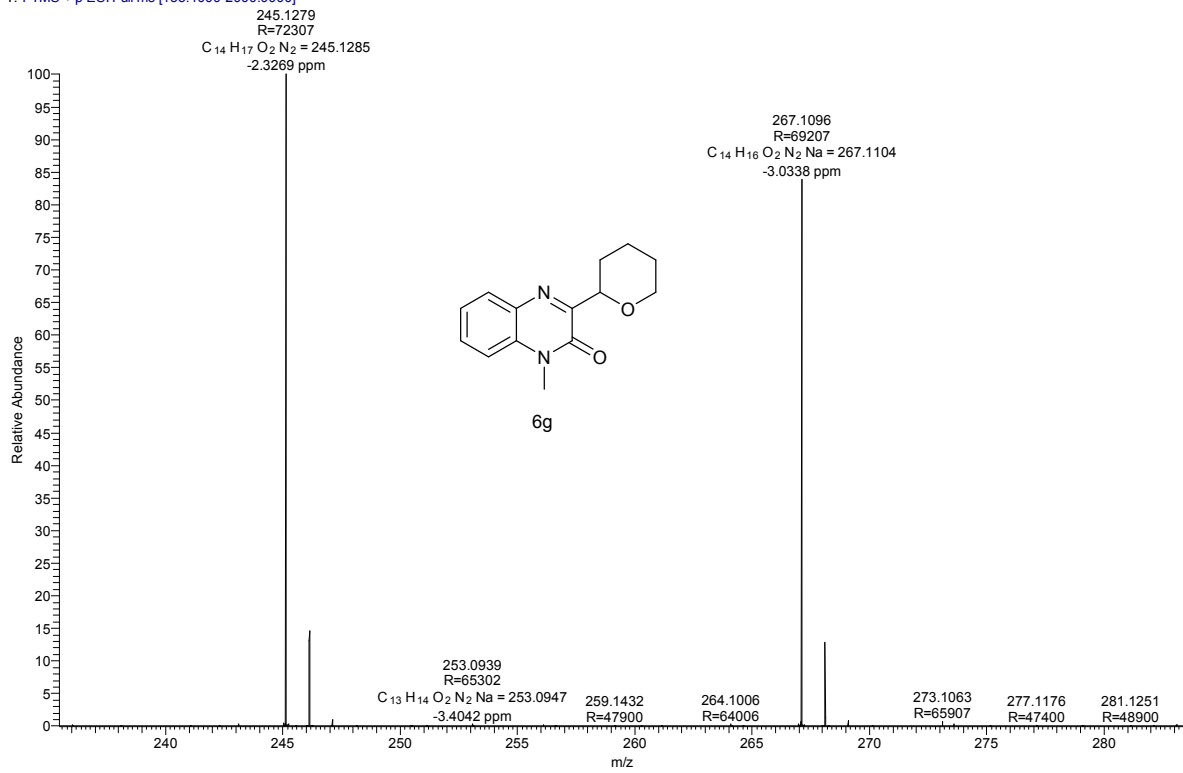

KB-33 #282 RT: 1.26 AV: 1 NL: 3.04E9  
T: FTMS + p ESI Full ms [133.4000-2000.0000]

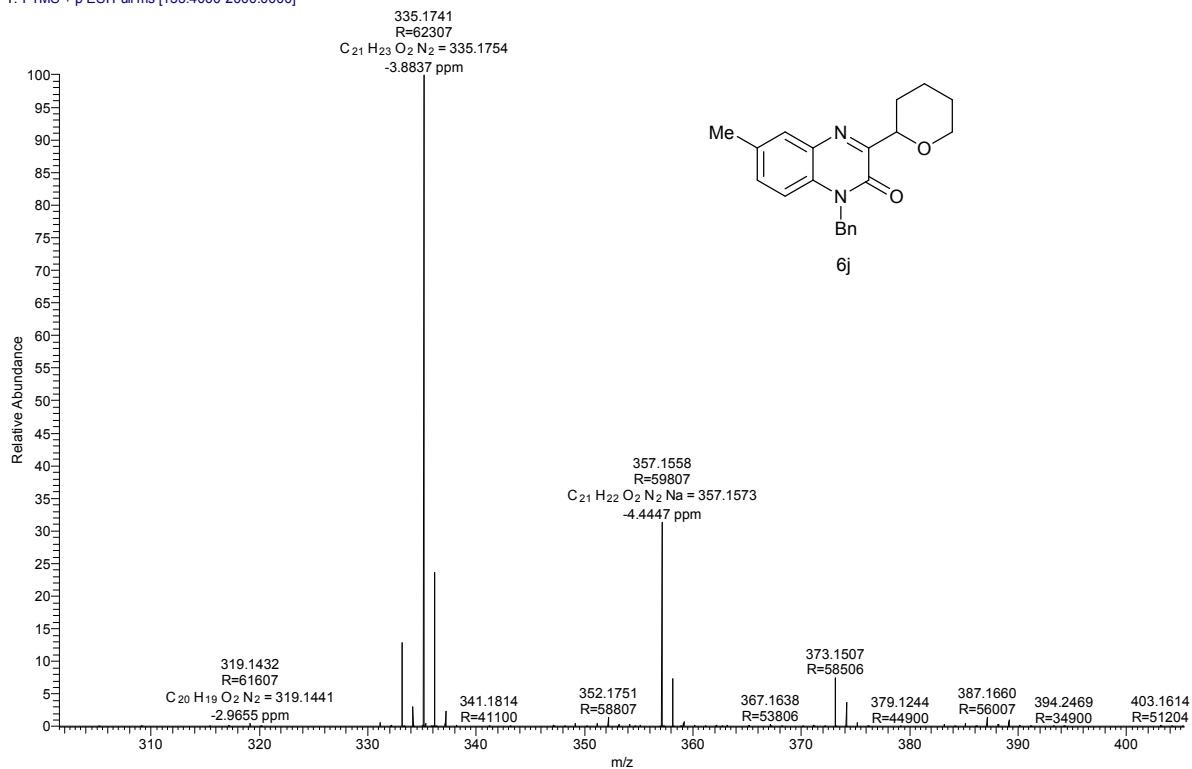

KB-31 #272 RT: 1.22 AV: 1 NL: 2.36E9  
T: FTMS + p ESI Full ms [133.4000-2000.0000]

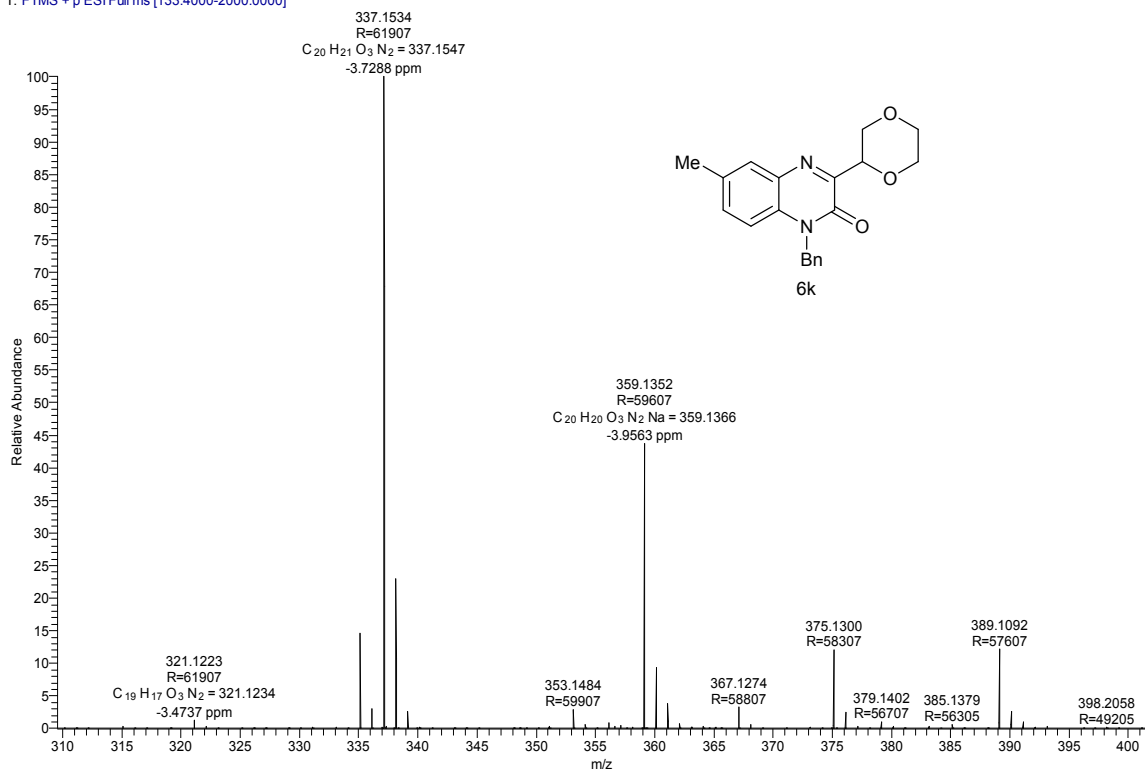



KN-304 #323 RT: 1.44 AV: 1 NL: 1.12E10  
T: FTMS + p ESI Full ms [100.0000-1500.0000]

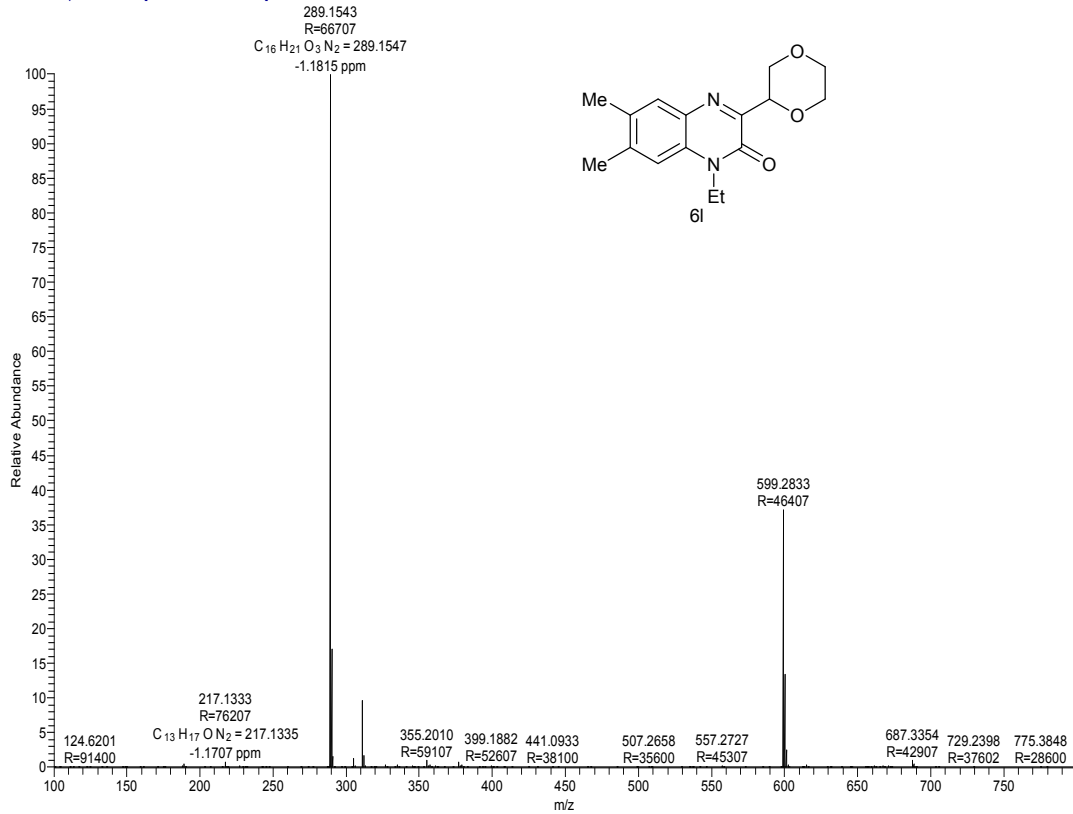

KN-302 #322 RT: 1.43 AV: 1 NL: 1.17E10  
T: FTMS + p ESI Full ms [100.0000-1500.0000]

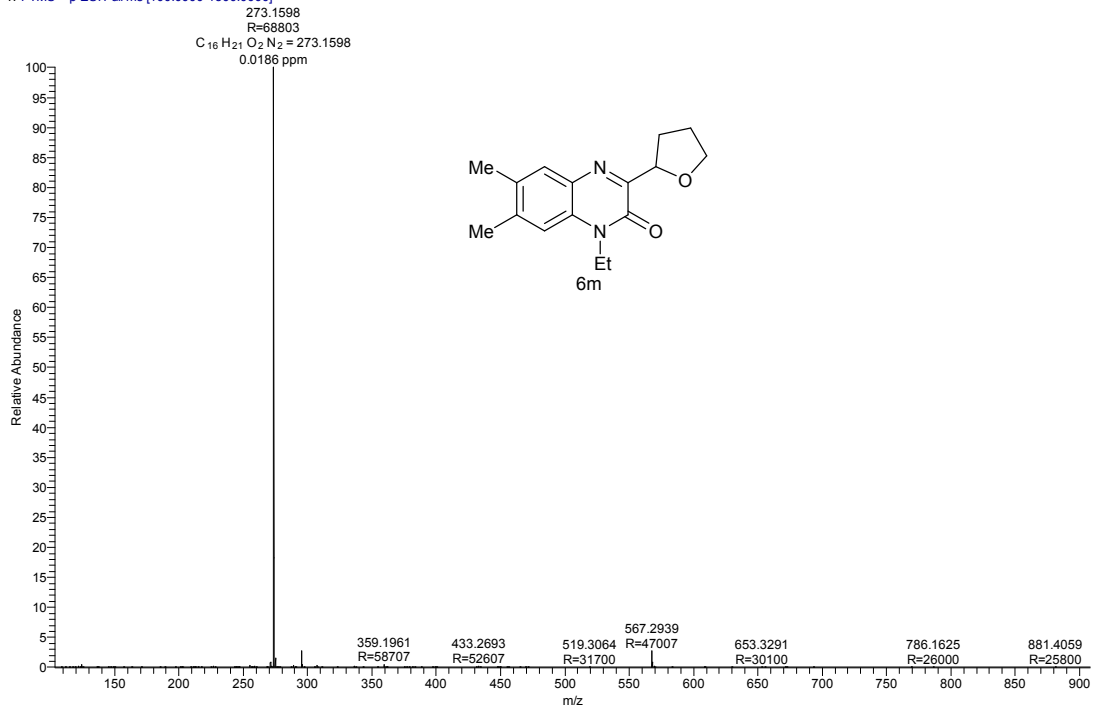

KN-304\_180723164230 #363 RT: 1.62 AV: 1 NL: 2.24E6  
T: FTMS + p ESI Full ms [100.0000-1500.0000]

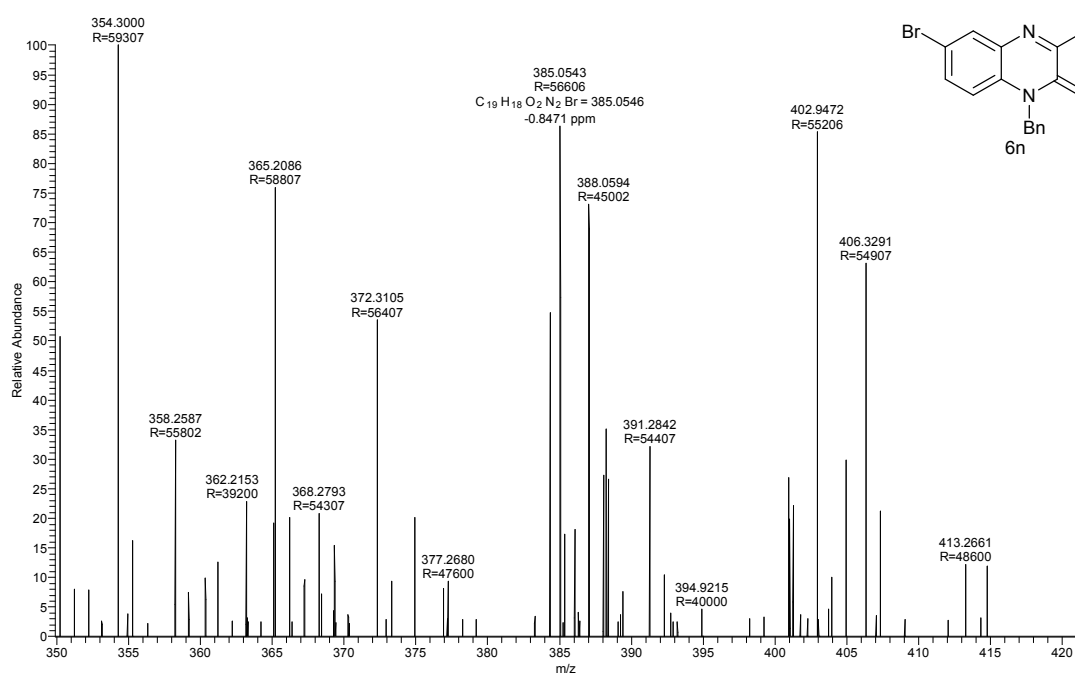

KB-35 #282 RT: 1.26 AV: 1 NL: 1.95E9  
T: FTMS + p ESI Full ms [133.4000-2000.0000]

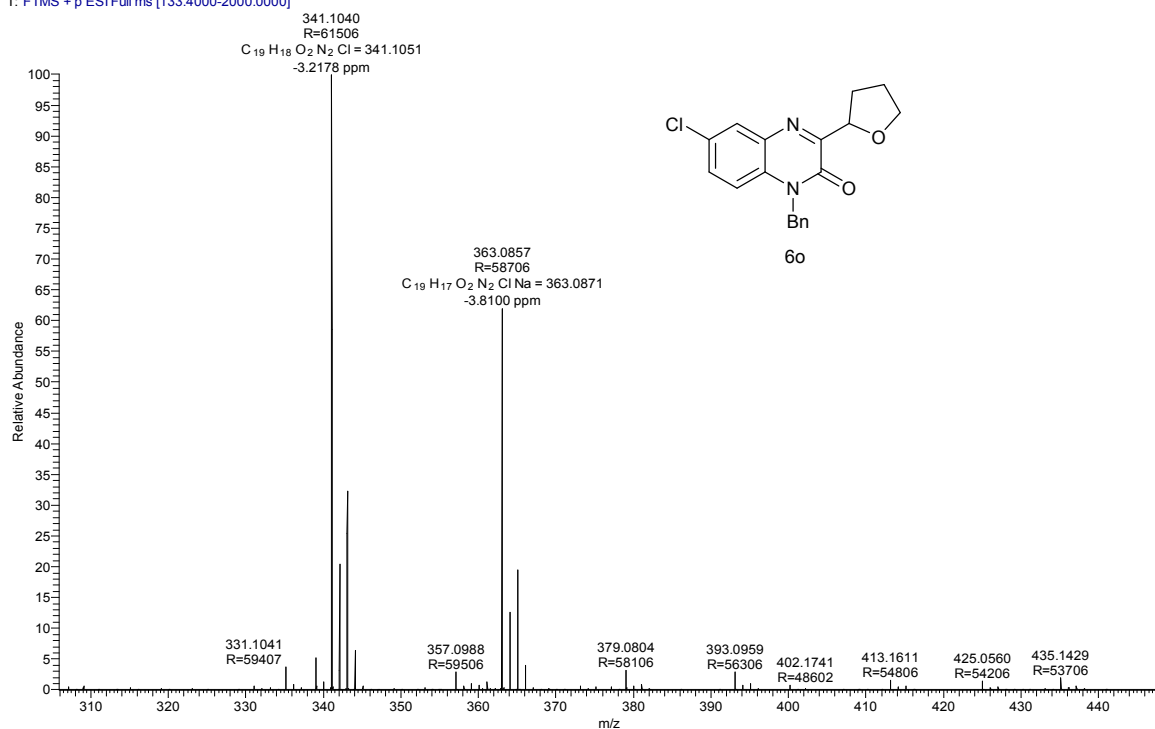

KB-15 #281 RT: 1.26 AV: 1 NL: 4.30E8  
T: FTMS + p ESI Fullms [133.4000-2000.0000]

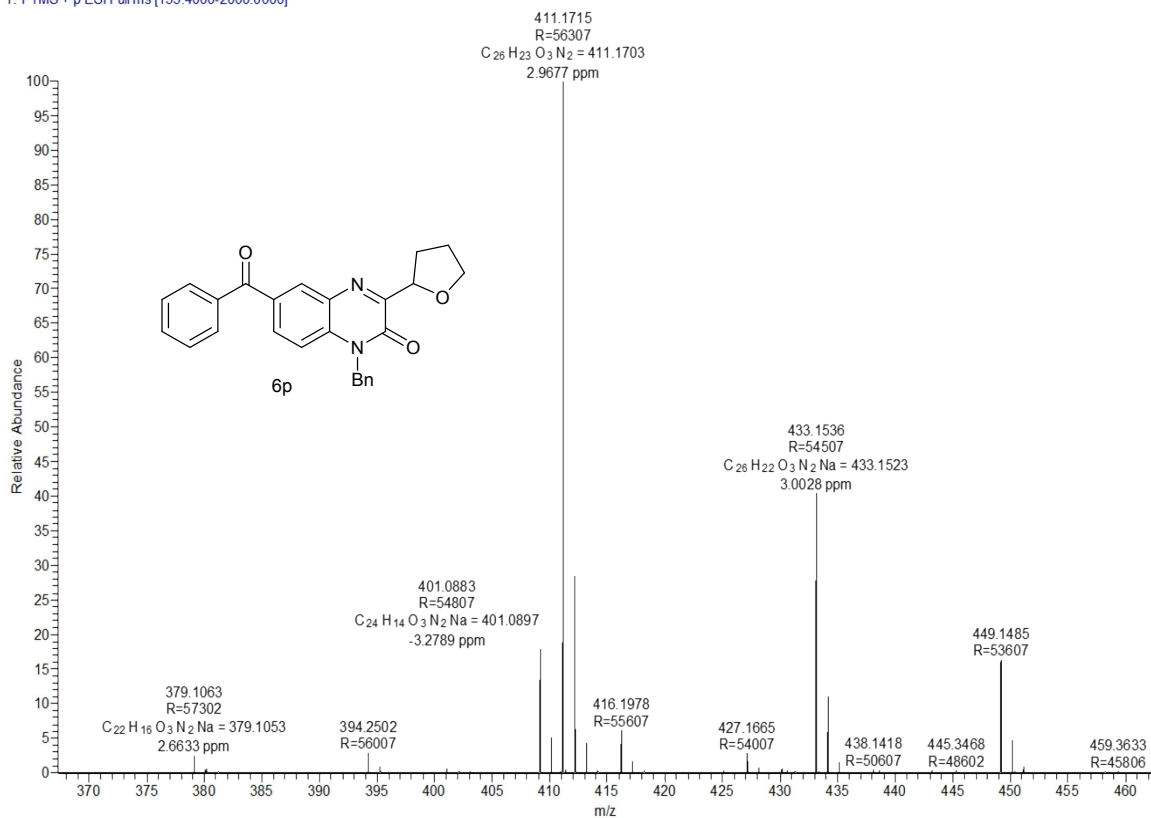

KB-41 #271 RT: 1.22 AV: 1 NL: 1.54E9  
T: FTMS + p ESI Fullms [133.4000-2000.0000]

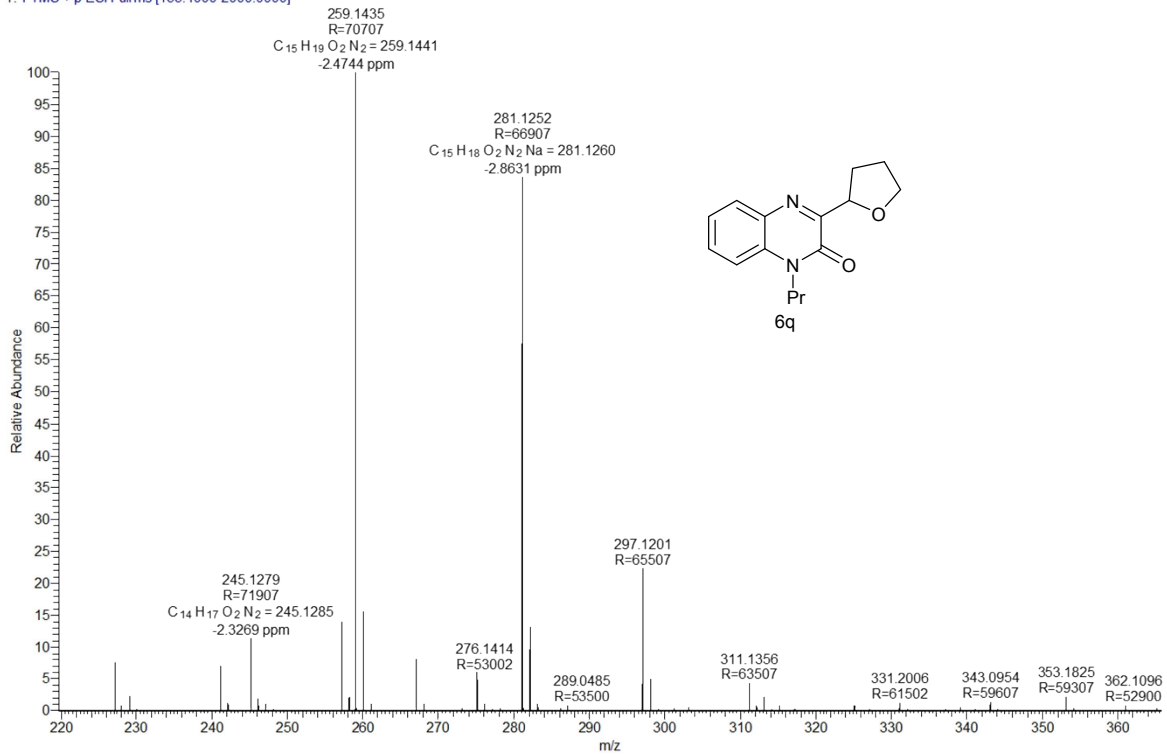

KB-36 #271 RT: 1.21 AV: 1 NL: 2.11E7  
T: FTMS + p ESI Full ms [133.4000-2000.0000]

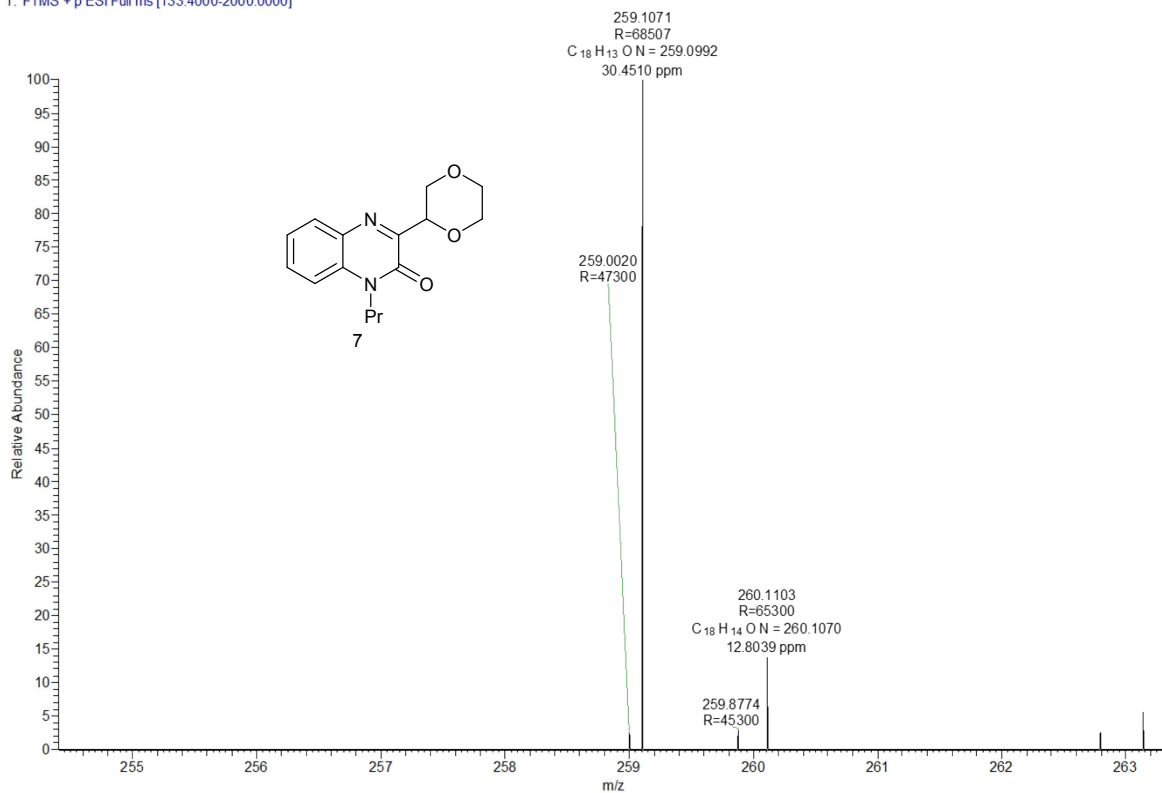

KB-38 #261 RT: 1.17 AV: 1 NL: 1.91E9  
T: FTMS + p ESI Full ms [133.4000-2000.0000]

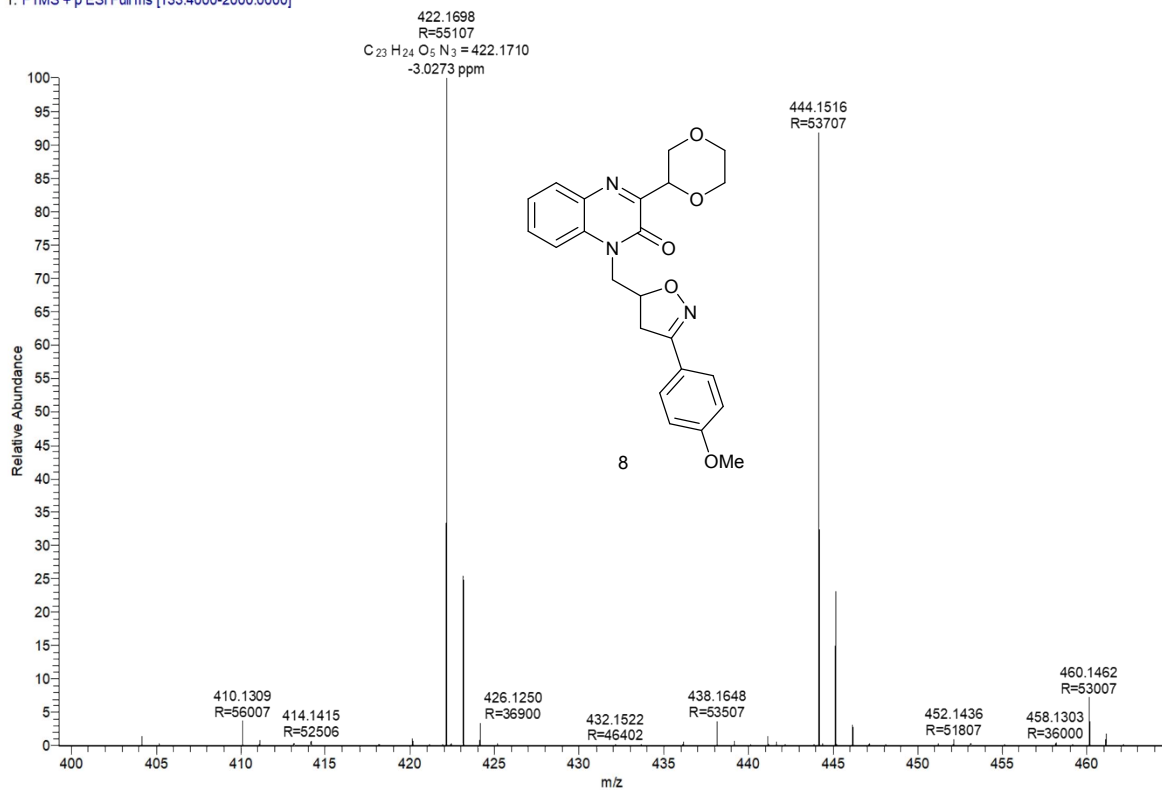

KB-12 #264 RT: 1.18 AV: 1 NL: 3.69E8  
T: FTMS + p ESI Full ms [133.4000-2000.0000]

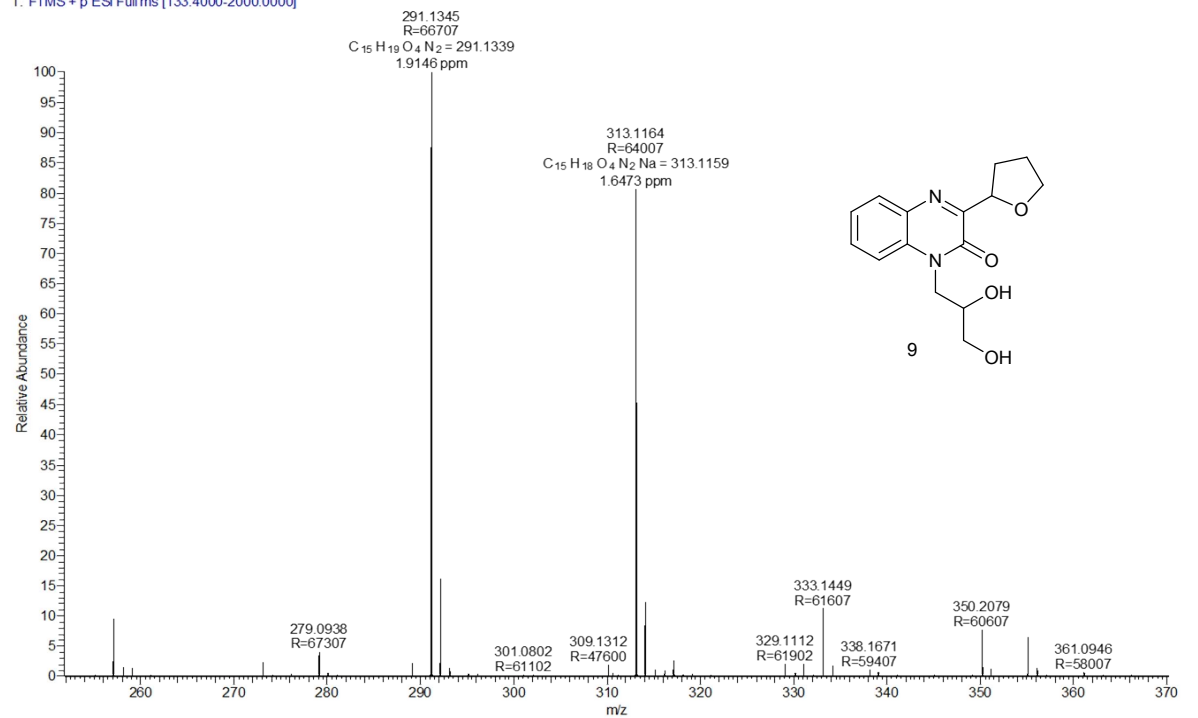

Supplement: c9nj00075e1.pdf [file c9nj00075e1.pdf]
